# Supplementary material for: Y-Chromosome Genetic Analysis of Modern Polish Population
Source: Front Genet. 2020 Oct 23;11:567309. doi: 10.3389/fgene.2020.567309 (PMC7644898; doi:10.3389/fgene.2020.567309)
Supplement: Supplementary file 4 [file Table_3.xlsx]

## Sheet: Sheet1
Table S3. The list of typed haplogroup for each sample.
ID	SNP observed in the derived state	representative SNP	Haplogroup Y-Chromosome Consortium nomenclature
human0001	E-M5389	E-M96	E
human0002	I-L80	I-M253	I1
human0003	I-L80	I-M253	I1
human0004	I-L80	I-M253	I1
human0005	I-L460	I-L460	I2a
human0006	J-M172	J-M172	J2
human0007	R-M417	R-M417	R1a1a1
human0008	R-M417	R-M417	R1a1a1
human0009	R-M417	R-M417	R1a1a1
human0010	R-M417	R-M417	R1a1a1
human0011	R-M417	R-M417	R1a1a1
human0012	R-M417	R-M417	R1a1a1
human0013	R-M417	R-M417	R1a1a1
human0014	R-M417	R-M417	R1a1a1
human0015	R-M417	R-M417	R1a1a1
human0016	R-M417	R-M417	R1a1a1
human0017	R-M417	R-M417	R1a1a1
human0018	R-M417	R-M417	R1a1a1
human0019	R-L23	R-L23	R1b1a2a
human0020	R-L23	R-L23	R1b1a2a
human0021	R-P311	R-P311	R1b1a2a1a
human0022	R-P311	R-P311	R1b1a2a1a
human0023	R-P311	R-P311	R1b1a2a1a
human0024	E-M5389	E-M96	E
human0025	I-L80	I-M253	I1
human0026	I-L460	I-L460	I2a
human0027	R-M417	R-M417	R1a1a1
human0028	R-M417	R-M417	R1a1a1
human0029	R-M417	R-M417	R1a1a1
human0030	R-M417	R-M417	R1a1a1
human0031	E-M5389	E-M96	E
human0032	E-M5389	E-M96	E
human0033	G-L14	G-L14	G2a2b1a1a
human0034	I-L460	I-L460	I2a
human0035	N-M178	N-M178	N1c1a
human0036	N-M178	N-M178	N1c1a
human0037	N-M178	N-M178	N1c1a
human0038	N-M178	N-M178	N1c1a
human0039	R-M417	R-M417	R1a1a1
human0040	R-M417	R-M417	R1a1a1
human0041	R-M417	R-M417	R1a1a1
human0042	R-M417	R-M417	R1a1a1
human0043	R-M417	R-M417	R1a1a1
human0044	R-M417	R-M417	R1a1a1
human0045	R-M417	R-M417	R1a1a1
human0046	R-M417	R-M417	R1a1a1
human0047	R-M417	R-M417	R1a1a1
human0048	R-M417	R-M417	R1a1a1
human0049	R-P311	R-P311	R1b1a2a1a
human0050	R-P311	R-P311	R1b1a2a1a
human0051	R-P311	R-P311	R1b1a2a1a
human0052	R-L21	R-L21	R1b1a2a1a2c
human0053	E-M5389	E-M96	E
human0054	I-L80	I-M253	I1
human0055	I-L460	I-L460	I2a
human0056	I-L460	I-L460	I2a
human0057	I-L460	I-L460	I2a
human0058	I-L460	I-L460	I2a
human0059	I-M223	I-M223	I2a2a
human0060	I-L38	I-L38	I2a2b
human0061	J-M267	J-M267	J1
human0062	R-M417	R-M417	R1a1a1
human0063	R-M417	R-M417	R1a1a1
human0064	R-M417	R-M417	R1a1a1
human0065	R-M417	R-M417	R1a1a1
human0066	R-M417	R-M417	R1a1a1
human0067	R-M417	R-M417	R1a1a1
human0068	R-M417	R-M417	R1a1a1
human0069	R-M417	R-M417	R1a1a1
human0070	R-M417	R-M417	R1a1a1
human0071	R-M417	R-M417	R1a1a1
human0072	R-M417	R-M417	R1a1a1
human0073	R-M417	R-M417	R1a1a1
human0074	R-M417	R-M417	R1a1a1
human0075	R-M417	R-M417	R1a1a1
human0076	R-M417	R-M417	R1a1a1
human0077	R-M417	R-M417	R1a1a1
human0078	R-M417	R-M417	R1a1a1
human0079	R-M417	R-M417	R1a1a1
human0080	R-M417	R-M417	R1a1a1
human0081	R-M417	R-M417	R1a1a1
human0082	R-M417	R-M417	R1a1a1
human0083	R-M417	R-M417	R1a1a1
human0084	R-M417	R-M417	R1a1a1
human0085	R-M417	R-M417	R1a1a1
human0086	R-M417	R-M417	R1a1a1
human0087	R-M417	R-M417	R1a1a1
human0088	R-M417	R-M417	R1a1a1
human0089	R-M417	R-M417	R1a1a1
human0090	R-M417	R-M417	R1a1a1
human0091	R-M417	R-M417	R1a1a1
human0092	R-M417	R-M417	R1a1a1
human0093	R-M417	R-M417	R1a1a1
human0094	R-M417	R-M417	R1a1a1
human0095	R-L23	R-L23	R1b1a2a
human0096	R-P311	R-P311	R1b1a2a1a
human0097	E-M5389	E-M96	E
human0098	E-M5389	E-M96	E
human0099	I-L460	I-L460	I2a
human0100	I-L460	I-L460	I2a
human0101	J-M172	J-M172	J2
human0102	N-M178	N-M178	N1c1a
human0103	R-M417	R-M417	R1a1a1
human0104	R-M417	R-M417	R1a1a1
human0105	R-M417	R-M417	R1a1a1
human0106	R-M417	R-M417	R1a1a1
human0107	R-L23	R-L23	R1b1a2a
human0108	E-M5389	E-M96	E
human0109	E-M5389	E-M96	E
human0110	N-M178	N-M178	N1c1a
human0111	R-M417	R-M417	R1a1a1
human0112	R-M417	R-M417	R1a1a1
human0113	E-M5389	E-M96	E
human0114	G-L13	G-L13	G2a2b2a1a1a1
human0115	I-M170	I-M170	I
human0116	N-M178	N-M178	N1c1a
human0117	R-M417	R-M417	R1a1a1
human0118	R-P311	R-P311	R1b1a2a1a
human0119	E-M5389	E-M96	E
human0120	I-L80	I-M253	I1
human0121	I-L80	I-M253	I1
human0122	I-L460	I-L460	I2a
human0123	N-M178	N-M178	N1c1a
human0124	R-M417	R-M417	R1a1a1
human0125	R-M417	R-M417	R1a1a1
human0126	R-M417	R-M417	R1a1a1
human0127	R-M417	R-M417	R1a1a1
human0128	R-M417	R-M417	R1a1a1
human0129	R-M417	R-M417	R1a1a1
human0130	R-M417	R-M417	R1a1a1
human0131	R-M269	R-M269	R1b1a2
human0132	R-L23	R-L23	R1b1a2a
human0133	R-P311	R-P311	R1b1a2a1a
human0134	R-P311	R-P311	R1b1a2a1a
human0135	E-M5389	E-M96	E
human0136	E-M5389	E-M96	E
human0137	G-P15	G-P15	G2a
human0138	I-L80	I-M253	I1
human0139	I-L80	I-M253	I1
human0140	I-M72	I-M72	I1a1a1
human0141	I-L460	I-L460	I2a
human0142	I-L460	I-L460	I2a
human0143	I-L460	I-L460	I2a
human0144	I-L460	I-L460	I2a
human0145	J-L27	J-L26	J2a1
human0146	R-M417	R-M417	R1a1a1
human0147	R-M417	R-M417	R1a1a1
human0148	R-M417	R-M417	R1a1a1
human0149	R-M417	R-M417	R1a1a1
human0150	R-M417	R-M417	R1a1a1
human0151	R-M417	R-M417	R1a1a1
human0152	R-M417	R-M417	R1a1a1
human0153	R-M417	R-M417	R1a1a1
human0154	R-M417	R-M417	R1a1a1
human0155	R-M417	R-M417	R1a1a1
human0156	R-M417	R-M417	R1a1a1
human0157	R-M417	R-M417	R1a1a1
human0158	R-M417	R-M417	R1a1a1
human0159	R-M417	R-M417	R1a1a1
human0160	R-M417	R-M417	R1a1a1
human0161	R-M417	R-M417	R1a1a1
human0162	R-M417	R-M417	R1a1a1
human0163	R-M417	R-M417	R1a1a1
human0164	R-M417	R-M417	R1a1a1
human0165	R-M417	R-M417	R1a1a1
human0166	R-M417	R-M417	R1a1a1
human0167	R-M417	R-M417	R1a1a1
human0168	R-P311	R-P311	R1b1a2a1a
human0169	R-P311	R-P311	R1b1a2a1a
human0170	R-P311	R-P311	R1b1a2a1a
human0171	R-P311	R-P311	R1b1a2a1a
human0172	E-M5389	E-M96	E
human0173	I-L80	I-M253	I1
human0174	J-L27	J-L26	J2a1
human0175	R-M417	R-M417	R1a1a1
human0176	R-M417	R-M417	R1a1a1
human0177	R-M417	R-M417	R1a1a1
human0178	R-M417	R-M417	R1a1a1
human0179	R-M417	R-M417	R1a1a1
human0180	R-M417	R-M417	R1a1a1
human0181	R-L23	R-L23	R1b1a2a
human0182	R-P311	R-P311	R1b1a2a1a
human0183	E-M5389	E-M96	E
human0184	E-M5389	E-M96	E
human0185	R-M417	R-M417	R1a1a1
human0186	R-M417	R-M417	R1a1a1
human0187	E-M5389	E-M96	E
human0188	I-L80	I-M253	I1
human0189	I-L80	I-M253	I1
human0190	I-L460	I-L460	I2a
human0191	I-L460	I-L460	I2a
human0192	I-L460	I-L460	I2a
human0193	I-L460	I-L460	I2a
human0194	J-M172	J-M172	J2
human0195	J-M92	J-M92	J2a1b1
human0196	J-L70	J-L70	J2a1h2a1
human0197	N-M178	N-M178	N1c1a
human0198	R-M417	R-M417	R1a1a1
human0199	R-M417	R-M417	R1a1a1
human0200	R-M417	R-M417	R1a1a1
human0201	R-M417	R-M417	R1a1a1
human0202	R-M417	R-M417	R1a1a1
human0203	R-M417	R-M417	R1a1a1
human0204	R-M417	R-M417	R1a1a1
human0205	R-M417	R-M417	R1a1a1
human0206	R-M417	R-M417	R1a1a1
human0207	R-M417	R-M417	R1a1a1
human0208	R-M417	R-M417	R1a1a1
human0209	R-M417	R-M417	R1a1a1
human0210	R-L23	R-L23	R1b1a2a
human0211	R-P311	R-P311	R1b1a2a1a
human0212	R-P311	R-P311	R1b1a2a1a
human0213	R-P311	R-P311	R1b1a2a1a
human0214	R-P311	R-P311	R1b1a2a1a
human0215	R-P311	R-P311	R1b1a2a1a
human0216	R-P311	R-P311	R1b1a2a1a
human0217	R-P311	R-P311	R1b1a2a1a
human0218	E-M5389	E-M96	E
human0219	G-M377	G-M377	G2b1
human0220	N-M178	N-M178	N1c1a
human0221	R-M417	R-M417	R1a1a1
human0222	R-M417	R-M417	R1a1a1
human0223	R-M417	R-M417	R1a1a1
human0224	R-M417	R-M417	R1a1a1
human0225	R-M417	R-M417	R1a1a1
human0226	R-M417	R-M417	R1a1a1
human0227	R-L23	R-L23	R1b1a2a
human0228	R-P311	R-P311	R1b1a2a1a
human0229	R-L21	R-L21	R1b1a2a1a2c
human0230	E-M5389	E-M96	E
human0231	E-M5389	E-M96	E
human0232	G-P15	G-P15	G2a
human0233	I-L460	I-L460	I2a
human0234	I-L460	I-L460	I2a
human0235	I-L460	I-L460	I2a
human0236	J-M267	J-M267	J1
human0237	R-M417	R-M417	R1a1a1
human0238	R-M417	R-M417	R1a1a1
human0239	R-M417	R-M417	R1a1a1
human0240	R-M417	R-M417	R1a1a1
human0241	R-M417	R-M417	R1a1a1
human0242	R-M417	R-M417	R1a1a1
human0243	R-M417	R-M417	R1a1a1
human0244	R-M417	R-M417	R1a1a1
human0245	R-M417	R-M417	R1a1a1
human0246	R-M417	R-M417	R1a1a1
human0247	R-M417	R-M417	R1a1a1
human0248	R-M417	R-M417	R1a1a1
human0249	R-L23	R-L23	R1b1a2a
human0250	R-P311	R-P311	R1b1a2a1a
human0251	R-P311	R-P311	R1b1a2a1a
human0252	E-M5389	E-M96	E
human0253	I-L460	I-L460	I2a
human0254	N-M178	N-M178	N1c1a
human0255	R-M417	R-M417	R1a1a1
human0256	R-M417	R-M417	R1a1a1
human0257	R-M417	R-M417	R1a1a1
human0258	R-M417	R-M417	R1a1a1
human0259	R-M417	R-M417	R1a1a1
human0260	R-M417	R-M417	R1a1a1
human0261	R-M417	R-M417	R1a1a1
human0262	R-M417	R-M417	R1a1a1
human0263	R-M417	R-M417	R1a1a1
human0264	R-L23	R-L23	R1b1a2a
human0265	E-M5389	E-M96	E
human0266	G-L42	G-L42	G2a2b2a1a1b1a1a
human0267	I-L460	I-L460	I2a
human0268	I-M26	I-M26	I2a1a1
human0269	T-L131	T-L131	T1a2
human0270	R-M417	R-M417	R1a1a1
human0271	R-M417	R-M417	R1a1a1
human0272	R-M417	R-M417	R1a1a1
human0273	R-M417	R-M417	R1a1a1
human0274	R-M417	R-M417	R1a1a1
human0275	R-M417	R-M417	R1a1a1
human0276	R-L23	R-L23	R1b1a2a
human0277	R-L23	R-L23	R1b1a2a
human0278	R-L23	R-L23	R1b1a2a
human0279	R-P311	R-P311	R1b1a2a1a
human0280	R-P311	R-P311	R1b1a2a1a
human0281	R-P311	R-P311	R1b1a2a1a
human0282	R-L20	R-L20	R1b1a2a1a2b1a1
human0283	E-M5389	E-M96	E
human0284	I-L80	I-M253	I1
human0285	I-L460	I-L460	I2a
human0286	J-M172	J-M172	J2
human0287	N-M178	N-M178	N1c1a
human0288	R-M417	R-M417	R1a1a1
human0289	R-M417	R-M417	R1a1a1
human0290	R-M417	R-M417	R1a1a1
human0291	R-M417	R-M417	R1a1a1
human0292	R-M417	R-M417	R1a1a1
human0293	R-M417	R-M417	R1a1a1
human0294	R-M417	R-M417	R1a1a1
human0295	R-M417	R-M417	R1a1a1
human0296	R-M417	R-M417	R1a1a1
human0297	R-M417	R-M417	R1a1a1
human0298	R-M417	R-M417	R1a1a1
human0299	R-M417	R-M417	R1a1a1
human0300	R-L23	R-L23	R1b1a2a
human0301	R-P311	R-P311	R1b1a2a1a
human0302	R-P311	R-P311	R1b1a2a1a
human0303	R-P311	R-P311	R1b1a2a1a
human0304	E-M5389	E-M96	E
human0305	N-M178	N-M178	N1c1a
human0306	R-M417	R-M417	R1a1a1
human0307	R-M417	R-M417	R1a1a1
human0308	R-M417	R-M417	R1a1a1
human0309	R-M417	R-M417	R1a1a1
human0310	R-M417	R-M417	R1a1a1
human0311	R-L23	R-L23	R1b1a2a
human0312	R-P311	R-P311	R1b1a2a1a
human0313	R-P311	R-P311	R1b1a2a1a
human0314	E-M5389	E-M96	E
human0315	I-L460	I-L460	I2a
human0316	I-M223	I-M223	I2a2a
human0317	J-L24	J-L24	J2a1h
human0318	N-M178	N-M178	N1c1a
human0319	R-M417	R-M417	R1a1a1
human0320	R-M417	R-M417	R1a1a1
human0321	R-M417	R-M417	R1a1a1
human0322	R-M417	R-M417	R1a1a1
human0323	R-M417	R-M417	R1a1a1
human0324	R-L23	R-L23	R1b1a2a
human0325	R-P311	R-P311	R1b1a2a1a
human0326	R-P311	R-P311	R1b1a2a1a
human0327	E-M5389	E-M96	E
human0328	C-M216	C-M130	C
human0329	G-P15	G-P15	G2a
human0330	I-L80	I-M253	I1
human0331	I-P109	I-P109	I1a1b1
human0332	I-L460	I-L460	I2a
human0333	R-M417	R-M417	R1a1a1
human0334	R-M417	R-M417	R1a1a1
human0335	R-M417	R-M417	R1a1a1
human0336	R-M417	R-M417	R1a1a1
human0337	R-P311	R-P311	R1b1a2a1a
human0338	R-P311	R-P311	R1b1a2a1a
human0339	R-P311	R-P311	R1b1a2a1a
human0340	E-M5389	E-M96	E
human0341	I-L80	I-M253	I1
human0342	I-M307.2	I-M253	I1
human0343	I-L22	I-L22	I1a1b
human0344	I-L460	I-L460	I2a
human0345	Q-L214	Q-M378	Q1b1
human0346	R-M417	R-M417	R1a1a1
human0347	R-M417	R-M417	R1a1a1
human0348	R-M417	R-M417	R1a1a1
human0349	R-M417	R-M417	R1a1a1
human0350	R-M417	R-M417	R1a1a1
human0351	R-M417	R-M417	R1a1a1
human0352	R-M417	R-M417	R1a1a1
human0353	R-M417	R-M417	R1a1a1
human0354	R-M417	R-M417	R1a1a1
human0355	R-M417	R-M417	R1a1a1
human0356	R-M417	R-M417	R1a1a1
human0357	R-P311	R-P311	R1b1a2a1a
human0358	E-M5389	E-M96	E
human0359	J-M267	J-M267	J1
human0360	J-M172	J-M172	J2
human0361	N-M178	N-M178	N1c1a
human0362	R-M417	R-M417	R1a1a1
human0363	R-M417	R-M417	R1a1a1
human0364	R-M417	R-M417	R1a1a1
human0365	R-M417	R-M417	R1a1a1
human0366	R-M417	R-M417	R1a1a1
human0367	R-L23	R-L23	R1b1a2a
human0368	R-L23	R-L23	R1b1a2a
human0369	R-L20	R-L20	R1b1a2a1a2b1a1
human0370	E-M5389	E-M96	E
human0371	I-L22	I-L22	I1a1b
human0372	I-L460	I-L460	I2a
human0373	R-M417	R-M417	R1a1a1
human0374	R-M417	R-M417	R1a1a1
human0375	R-M417	R-M417	R1a1a1
human0376	R-M417	R-M417	R1a1a1
human0377	R-M417	R-M417	R1a1a1
human0378	R-P311	R-P311	R1b1a2a1a
human0379	R-P311	R-P311	R1b1a2a1a
human0380	R-L21	R-L21	R1b1a2a1a2c
human0381	E-M5389	E-M96	E
human0382	R-M417	R-M417	R1a1a1
human0383	R-M417	R-M417	R1a1a1
human0384	R-M417	R-M417	R1a1a1
human0385	R-M417	R-M417	R1a1a1
human0386	E-M5389	E-M96	E
human0387	R-M417	R-M417	R1a1a1
human0388	R-M417	R-M417	R1a1a1
human0389	R-M417	R-M417	R1a1a1
human0390	R-M417	R-M417	R1a1a1
human0391	R-L23	R-L23	R1b1a2a
human0392	E-M5389	E-M96	E
human0393	R-M417	R-M417	R1a1a1
human0394	R-M417	R-M417	R1a1a1
human0395	R-M417	R-M417	R1a1a1
human0396	R-M417	R-M417	R1a1a1
human0397	R-M417	R-M417	R1a1a1
human0398	R-M417	R-M417	R1a1a1
human0399	R-M417	R-M417	R1a1a1
human0400	R-M417	R-M417	R1a1a1
human0401	R-M417	R-M417	R1a1a1
human0402	R-M417	R-M417	R1a1a1
human0403	E-M5389	E-M96	E
human0404	E-V13	E-V13	E1b1b1a1b1a
human0405	I-L80	I-M253	I1
human0406	I-M72	I-M72	I1a1a1
human0407	R-M417	R-M417	R1a1a1
human0408	R-M417	R-M417	R1a1a1
human0409	R-M417	R-M417	R1a1a1
human0410	R-M417	R-M417	R1a1a1
human0411	R-M417	R-M417	R1a1a1
human0412	R-M417	R-M417	R1a1a1
human0413	R-M417	R-M417	R1a1a1
human0414	R-M417	R-M417	R1a1a1
human0415	R-M417	R-M417	R1a1a1
human0416	R-M417	R-M417	R1a1a1
human0417	R-L23	R-L23	R1b1a2a
human0418	R-P311	R-P311	R1b1a2a1a
human0419	E-M5389	E-M96	E
human0420	I-M307.2	I-M253	I1
human0421	R-M417	R-M417	R1a1a1
human0422	R-M417	R-M417	R1a1a1
human0423	R-M417	R-M417	R1a1a1
human0424	R-M417	R-M417	R1a1a1
human0425	R-L23	R-L23	R1b1a2a
human0426	R-P311	R-P311	R1b1a2a1a
human0427	E-M5389	E-M96	E
human0428	I-L460	I-L460	I2a
human0429	J-M267	J-M267	J1
human0430	N-M178	N-M178	N1c1a
human0431	N-M178	N-M178	N1c1a
human0432	R-M417	R-M417	R1a1a1
human0433	R-M417	R-M417	R1a1a1
human0434	R-M417	R-M417	R1a1a1
human0435	R-M417	R-M417	R1a1a1
human0436	R-M417	R-M417	R1a1a1
human0437	R-M417	R-M417	R1a1a1
human0438	R-M417	R-M417	R1a1a1
human0439	R-M417	R-M417	R1a1a1
human0440	R-M417	R-M417	R1a1a1
human0441	R-P311	R-P311	R1b1a2a1a
human0442	E-M5389	E-M96	E
human0443	R-M417	R-M417	R1a1a1
human0444	R-M417	R-M417	R1a1a1
human0445	R-M417	R-M417	R1a1a1
human0446	R-M417	R-M417	R1a1a1
human0447	R-M417	R-M417	R1a1a1
human0448	R-M417	R-M417	R1a1a1
human0449	E-M5389	E-M96	E
human0450	I-L80	I-M253	I1
human0451	I-L460	I-L460	I2a
human0452	N-M178	N-M178	N1c1a
human0453	R-M417	R-M417	R1a1a1
human0454	R-M417	R-M417	R1a1a1
human0455	E-M5389	E-M96	E
human0456	E-M5389	E-M96	E
human0457	C-M216	C-M130	C
human0458	I-L80	I-M253	I1
human0459	I-L80	I-M253	I1
human0460	R-M417	R-M417	R1a1a1
human0461	R-M417	R-M417	R1a1a1
human0462	R-M417	R-M417	R1a1a1
human0463	R-M417	R-M417	R1a1a1
human0464	R-M417	R-M417	R1a1a1
human0465	R-M417	R-M417	R1a1a1
human0466	R-M417	R-M417	R1a1a1
human0467	R-M417	R-M417	R1a1a1
human0468	R-M417	R-M417	R1a1a1
human0469	R-M417	R-M417	R1a1a1
human0470	R-M417	R-M417	R1a1a1
human0471	R-M417	R-M417	R1a1a1
human0472	R-M417	R-M417	R1a1a1
human0473	R-M417	R-M417	R1a1a1
human0474	R-M417	R-M417	R1a1a1
human0475	R-M417	R-M417	R1a1a1
human0476	R-M417	R-M417	R1a1a1
human0477	R-M417	R-M417	R1a1a1
human0478	R-M417	R-M417	R1a1a1
human0479	R-M417	R-M417	R1a1a1
human0480	R-M417	R-M417	R1a1a1
human0481	R-M417	R-M417	R1a1a1
human0482	R-M417	R-M417	R1a1a1
human0483	R-M417	R-M417	R1a1a1
human0484	R-M417	R-M417	R1a1a1
human0485	R-L23	R-L23	R1b1a2a
human0486	R-L23	R-L23	R1b1a2a
human0487	R-P311	R-P311	R1b1a2a1a
human0488	R-P311	R-P311	R1b1a2a1a
human0489	R-P311	R-P311	R1b1a2a1a
human0490	R-P311	R-P311	R1b1a2a1a
human0491	R-P311	R-P311	R1b1a2a1a
human0492	R-P311	R-P311	R1b1a2a1a
human0493	E-M5389	E-M96	E
human0494	I-L460	I-L460	I2a
human0495	I-L460	I-L460	I2a
human0496	I-L460	I-L460	I2a
human0497	R-M417	R-M417	R1a1a1
human0498	R-M417	R-M417	R1a1a1
human0499	R-M417	R-M417	R1a1a1
human0500	R-M417	R-M417	R1a1a1
human0501	E-M5389	E-M96	E
human0502	I-L80	I-M253	I1
human0503	I-L460	I-L460	I2a
human0504	R-M417	R-M417	R1a1a1
human0505	R-M417	R-M417	R1a1a1
human0506	R-M417	R-M417	R1a1a1
human0507	R-M417	R-M417	R1a1a1
human0508	R-P311	R-P311	R1b1a2a1a
human0509	R-L20	R-L20	R1b1a2a1a2b1a1
human0510	E-M5389	E-M96	E
human0511	I-L460	I-L460	I2a
human0512	I-L460	I-L460	I2a
human0513	R-M417	R-M417	R1a1a1
human0514	R-M417	R-M417	R1a1a1
human0515	R-M417	R-M417	R1a1a1
human0516	R-M417	R-M417	R1a1a1
human0517	R-M417	R-M417	R1a1a1
human0518	E-M5389	E-M96	E
human0519	I-L80	I-M253	I1
human0520	R-M417	R-M417	R1a1a1
human0521	R-M417	R-M417	R1a1a1
human0522	E-M5389	E-M96	E
human0523	I-L460	I-L460	I2a
human0524	R-M417	R-M417	R1a1a1
human0525	R-M417	R-M417	R1a1a1
human0526	R-M417	R-M417	R1a1a1
human0527	R-M417	R-M417	R1a1a1
human0528	R-M417	R-M417	R1a1a1
human0529	R-M417	R-M417	R1a1a1
human0530	R-L23	R-L23	R1b1a2a
human0531	R-P311	R-P311	R1b1a2a1a
human0532	R-P311	R-P311	R1b1a2a1a
human0533	E-M5389	E-M96	E
human0534	I-L80	I-M253	I1
human0535	N-M178	N-M178	N1c1a
human0536	R-P311	R-P311	R1b1a2a1a
human0537	E-M5389	E-M96	E
human0538	I-L80	I-M253	I1
human0539	I-L460	I-L460	I2a
human0540	I-L460	I-L460	I2a
human0541	N-M178	N-M178	N1c1a
human0542	N-M178	N-M178	N1c1a
human0543	R-M417	R-M417	R1a1a1
human0544	R-M417	R-M417	R1a1a1
human0545	R-M417	R-M417	R1a1a1
human0546	R-M417	R-M417	R1a1a1
human0547	R-M417	R-M417	R1a1a1
human0548	R-M417	R-M417	R1a1a1
human0549	R-M417	R-M417	R1a1a1
human0550	R-M417	R-M417	R1a1a1
human0551	R-M417	R-M417	R1a1a1
human0552	R-L23	R-L23	R1b1a2a
human0553	R-P311	R-P311	R1b1a2a1a
human0554	R-L20	R-L20	R1b1a2a1a2b1a1
human0555	E-M5389	E-M96	E
human0556	I-L80	I-M253	I1
human0557	N-M178	N-M178	N1c1a
human0558	R-P311	R-P311	R1b1a2a1a
human0559	E-M5389	E-M96	E
human0560	I-L460	I-L460	I2a
human0561	I-L460	I-L460	I2a
human0562	J-M172	J-M172	J2
human0563	R-M417	R-M417	R1a1a1
human0564	R-M417	R-M417	R1a1a1
human0565	R-M417	R-M417	R1a1a1
human0566	R-M417	R-M417	R1a1a1
human0567	R-M417	R-M417	R1a1a1
human0568	R-M417	R-M417	R1a1a1
human0569	R-P311	R-P311	R1b1a2a1a
human0570	E-M5389	E-M96	E
human0571	E-M5389	E-M96	E
human0572	E-M5389	E-M96	E
human0573	E-M5389	E-M96	E
human0574	E-M5389	E-M96	E
human0575	G-M342	G-M342	G1
human0576	G-P15	G-P15	G2a
human0577	G-L13	G-L13	G2a2b2a1a1a1
human0578	I-L80	I-M253	I1
human0579	I-M307.2	I-M253	I1
human0580	I-L460	I-L460	I2a
human0581	I-L460	I-L460	I2a
human0582	I-L460	I-L460	I2a
human0583	I-L460	I-L460	I2a
human0584	J-M172	J-M172	J2
human0585	N-M178	N-M178	N1c1a
human0586	R-M417	R-M417	R1a1a1
human0587	R-M417	R-M417	R1a1a1
human0588	R-M417	R-M417	R1a1a1
human0589	R-M417	R-M417	R1a1a1
human0590	R-M417	R-M417	R1a1a1
human0591	R-M417	R-M417	R1a1a1
human0592	R-M417	R-M417	R1a1a1
human0593	R-M417	R-M417	R1a1a1
human0594	R-M417	R-M417	R1a1a1
human0595	R-M417	R-M417	R1a1a1
human0596	R-M417	R-M417	R1a1a1
human0597	R-M417	R-M417	R1a1a1
human0598	R-M417	R-M417	R1a1a1
human0599	R-M417	R-M417	R1a1a1
human0600	R-M417	R-M417	R1a1a1
human0601	R-M417	R-M417	R1a1a1
human0602	R-M417	R-M417	R1a1a1
human0603	R-M417	R-M417	R1a1a1
human0604	R-M417	R-M417	R1a1a1
human0605	R-M417	R-M417	R1a1a1
human0606	R-M417	R-M417	R1a1a1
human0607	R-L23	R-L23	R1b1a2a
human0608	R-P311	R-P311	R1b1a2a1a
human0609	R-P311	R-P311	R1b1a2a1a
human0610	R-P311	R-P311	R1b1a2a1a
human0611	R-P311	R-P311	R1b1a2a1a
human0612	E-M5389	E-M96	E
human0613	E-M5389	E-M96	E
human0614	I-L460	I-L460	I2a
human0615	R-M417	R-M417	R1a1a1
human0616	R-M417	R-M417	R1a1a1
human0617	R-M417	R-M417	R1a1a1
human0618	R-M417	R-M417	R1a1a1
human0619	R-M417	R-M417	R1a1a1
human0620	R-M417	R-M417	R1a1a1
human0621	R-M417	R-M417	R1a1a1
human0622	R-P311	R-P311	R1b1a2a1a
human0623	E-M5389	E-M96	E
human0624	I-L22	I-L22	I1a1b
human0625	I-L460	I-L460	I2a
human0626	J-M267	J-M267	J1
human0627	J-M172	J-M172	J2
human0628	J-L27	J-L26	J2a1
human0629	R-M417	R-M417	R1a1a1
human0630	R-M417	R-M417	R1a1a1
human0631	R-M417	R-M417	R1a1a1
human0632	R-M417	R-M417	R1a1a1
human0633	R-M417	R-M417	R1a1a1
human0634	R-M417	R-M417	R1a1a1
human0635	R-M417	R-M417	R1a1a1
human0636	R-M417	R-M417	R1a1a1
human0637	R-M417	R-M417	R1a1a1
human0638	R-M417	R-M417	R1a1a1
human0639	R-M417	R-M417	R1a1a1
human0640	R-M417	R-M417	R1a1a1
human0641	R-M417	R-M417	R1a1a1
human0642	R-M417	R-M417	R1a1a1
human0643	R-M417	R-M417	R1a1a1
human0644	R-M417	R-M417	R1a1a1
human0645	R-P311	R-P311	R1b1a2a1a
human0646	R-P311	R-P311	R1b1a2a1a
human0647	R-P311	R-P311	R1b1a2a1a
human0648	E-M5389	E-M96	E
human0649	E-M5389	E-M96	E
human0650	I-L460	I-L460	I2a
human0651	N-M178	N-M178	N1c1a
human0652	R-M417	R-M417	R1a1a1
human0653	R-M417	R-M417	R1a1a1
human0654	R-M417	R-M417	R1a1a1
human0655	R-M417	R-M417	R1a1a1
human0656	R-P311	R-P311	R1b1a2a1a
human0657	E-M5389	E-M96	E
human0658	E-M5389	E-M96	E
human0659	E-M5389	E-M96	E
human0660	E-M5389	E-M96	E
human0661	G-P15	G-P15	G2a
human0662	I-L80	I-M253	I1
human0663	I-L80	I-M253	I1
human0664	I-L460	I-L460	I2a
human0665	I-L460	I-L460	I2a
human0666	I-L460	I-L460	I2a
human0667	J-M172	J-M172	J2
human0668	R-M417	R-M417	R1a1a1
human0669	R-M417	R-M417	R1a1a1
human0670	R-M417	R-M417	R1a1a1
human0671	R-M417	R-M417	R1a1a1
human0672	R-M417	R-M417	R1a1a1
human0673	R-M417	R-M417	R1a1a1
human0674	R-M417	R-M417	R1a1a1
human0675	R-M417	R-M417	R1a1a1
human0676	R-L23	R-L23	R1b1a2a
human0677	R-P311	R-P311	R1b1a2a1a
human0678	R-P311	R-P311	R1b1a2a1a
human0679	E-M5389	E-M96	E
human0680	I-L80	I-M253	I1
human0681	R-M417	R-M417	R1a1a1
human0682	R-M417	R-M417	R1a1a1
human0683	R-M417	R-M417	R1a1a1
human0684	R-M417	R-M417	R1a1a1
human0685	R-M417	R-M417	R1a1a1
human0686	R-M417	R-M417	R1a1a1
human0687	R-M417	R-M417	R1a1a1
human0688	R-M417	R-M417	R1a1a1
human0689	R-L23	R-L23	R1b1a2a
human0690	E-M5389	E-M96	E
human0691	J-M92	J-M92	J2a1b1
human0692	R-M417	R-M417	R1a1a1
human0693	R-M417	R-M417	R1a1a1
human0694	R-P311	R-P311	R1b1a2a1a
human0695	E-M5389	E-M96	E
human0696	R-M417	R-M417	R1a1a1
human0697	R-M417	R-M417	R1a1a1
human0698	R-M417	R-M417	R1a1a1
human0699	R-M417	R-M417	R1a1a1
human0700	R-L23	R-L23	R1b1a2a
human0701	R-L23	R-L23	R1b1a2a
human0702	R-P311	R-P311	R1b1a2a1a
human0703	R-P311	R-P311	R1b1a2a1a
human0704	E-M5389	E-M96	E
human0705	E-M5389	E-M96	E
human0706	R-M417	R-M417	R1a1a1
human0707	R-M417	R-M417	R1a1a1
human0708	R-M417	R-M417	R1a1a1
human0709	E-M5389	E-M96	E
human0710	E-M5389	E-M96	E
human0711	I-L460	I-L460	I2a
human0712	I-L460	I-L460	I2a
human0713	N-M178	N-M178	N1c1a
human0714	R-M417	R-M417	R1a1a1
human0715	R-M417	R-M417	R1a1a1
human0716	R-M417	R-M417	R1a1a1
human0717	R-M417	R-M417	R1a1a1
human0718	R-M417	R-M417	R1a1a1
human0719	R-M417	R-M417	R1a1a1
human0720	R-M417	R-M417	R1a1a1
human0721	R-M417	R-M417	R1a1a1
human0722	R-M417	R-M417	R1a1a1
human0723	R-M417	R-M417	R1a1a1
human0724	E-M5389	E-M96	E
human0725	C-M216	C-M130	C
human0726	I-L80	I-M253	I1
human0727	I-L460	I-L460	I2a
human0728	R-M417	R-M417	R1a1a1
human0729	R-M417	R-M417	R1a1a1
human0730	R-M417	R-M417	R1a1a1
human0731	R-M417	R-M417	R1a1a1
human0732	R-P311	R-P311	R1b1a2a1a
human0733	R-P311	R-P311	R1b1a2a1a
human0734	R-P311	R-P311	R1b1a2a1a
human0735	R-P311	R-P311	R1b1a2a1a
human0736	E-M5389	E-M96	E
human0737	I-L460	I-L460	I2a
human0738	N-M178	N-M178	N1c1a
human0739	E-M5389	E-M96	E
human0740	G-P15	G-P15	G2a
human0741	I-L80	I-M253	I1
human0742	I-L460	I-L460	I2a
human0743	I-L460	I-L460	I2a
human0744	N-M178	N-M178	N1c1a
human0745	N-M178	N-M178	N1c1a
human0746	N-M178	N-M178	N1c1a
human0747	R-M417	R-M417	R1a1a1
human0748	R-M417	R-M417	R1a1a1
human0749	R-M417	R-M417	R1a1a1
human0750	R-M417	R-M417	R1a1a1
human0751	R-M417	R-M417	R1a1a1
human0752	R-M417	R-M417	R1a1a1
human0753	R-M417	R-M417	R1a1a1
human0754	E-M5389	E-M96	E
human0755	I-L460	I-L460	I2a
human0756	T-M70	T-M70	T1a
human0757	N-M178	N-M178	N1c1a
human0758	R-M417	R-M417	R1a1a1
human0759	R-M417	R-M417	R1a1a1
human0760	E-M5389	E-M96	E
human0761	I-L460	I-L460	I2a
human0762	J-M92	J-M92	J2a1b1
human0763	N-M178	N-M178	N1c1a
human0764	R-M417	R-M417	R1a1a1
human0765	R-M417	R-M417	R1a1a1
human0766	R-M417	R-M417	R1a1a1
human0767	R-M417	R-M417	R1a1a1
human0768	R-M417	R-M417	R1a1a1
human0769	R-M417	R-M417	R1a1a1
human0770	R-M417	R-M417	R1a1a1
human0771	R-M417	R-M417	R1a1a1
human0772	R-M417	R-M417	R1a1a1
human0773	R-M417	R-M417	R1a1a1
human0774	R-M417	R-M417	R1a1a1
human0775	R-M417	R-M417	R1a1a1
human0776	R-P311	R-P311	R1b1a2a1a
human0777	R-P311	R-P311	R1b1a2a1a
human0778	E-M5389	E-M96	E
human0779	R-M417	R-M417	R1a1a1
human0780	R-M417	R-M417	R1a1a1
human0781	R-M417	R-M417	R1a1a1
human0782	R-M417	R-M417	R1a1a1
human0783	E-M5389	E-M96	E
human0784	R-M417	R-M417	R1a1a1
human0785	R-M417	R-M417	R1a1a1
human0786	R-M417	R-M417	R1a1a1
human0787	R-M417	R-M417	R1a1a1
human0788	E-M5389	E-M96	E
human0789	E-M5389	E-M96	E
human0790	E-M5389	E-M96	E
human0791	J-M267	J-M267	J1
human0792	R-M417	R-M417	R1a1a1
human0793	R-M417	R-M417	R1a1a1
human0794	R-M417	R-M417	R1a1a1
human0795	R-M417	R-M417	R1a1a1
human0796	R-M417	R-M417	R1a1a1
human0797	R-M417	R-M417	R1a1a1
human0798	R-M417	R-M417	R1a1a1
human0799	R-M417	R-M417	R1a1a1
human0800	R-M417	R-M417	R1a1a1
human0801	R-M417	R-M417	R1a1a1
human0802	R-M417	R-M417	R1a1a1
human0803	R-M417	R-M417	R1a1a1
human0804	R-M417	R-M417	R1a1a1
human0805	R-M417	R-M417	R1a1a1
human0806	R-M417	R-M417	R1a1a1
human0807	R-P311	R-P311	R1b1a2a1a
human0808	E-M5389	E-M96	E
human0809	J-M172	J-M172	J2
human0810	E-M5389	E-M96	E
human0811	I-L460	I-L460	I2a
human0812	I-L460	I-L460	I2a
human0813	N-M178	N-M178	N1c1a
human0814	R-M417	R-M417	R1a1a1
human0815	R-M417	R-M417	R1a1a1
human0816	E-M5389	E-M96	E
human0817	E-M5389	E-M96	E
human0818	I-L80	I-M253	I1
human0819	I-L80	I-M253	I1
human0820	I-M307.2	I-M253	I1
human0821	I-L80	I-M253	I1
human0822	I-L460	I-L460	I2a
human0823	R-M417	R-M417	R1a1a1
human0824	R-M417	R-M417	R1a1a1
human0825	R-M417	R-M417	R1a1a1
human0826	R-M417	R-M417	R1a1a1
human0827	R-M417	R-M417	R1a1a1
human0828	R-P311	R-P311	R1b1a2a1a
human0829	R-P311	R-P311	R1b1a2a1a
human0830	E-M5389	E-M96	E
human0831	E-M5389	E-M96	E
human0832	R-M417	R-M417	R1a1a1
human0833	R-M417	R-M417	R1a1a1
human0834	E-M5389	E-M96	E
human0835	R-M417	R-M417	R1a1a1
human0836	R-M417	R-M417	R1a1a1
human0837	E-M5389	E-M96	E
human0838	E-M5389	E-M96	E
human0839	E-M5389	E-M96	E
human0840	I-L80	I-M253	I1
human0841	I-L80	I-M253	I1
human0842	I-L80	I-M253	I1
human0843	I-L80	I-M253	I1
human0844	I-L460	I-L460	I2a
human0845	I-L460	I-L460	I2a
human0846	I-L460	I-L460	I2a
human0847	J-M172	J-M172	J2
human0848	J-L27	J-L26	J2a1
human0849	N-M178	N-M178	N1c1a
human0850	R-M417	R-M417	R1a1a1
human0851	R-M417	R-M417	R1a1a1
human0852	R-M417	R-M417	R1a1a1
human0853	R-M417	R-M417	R1a1a1
human0854	R-M417	R-M417	R1a1a1
human0855	R-M417	R-M417	R1a1a1
human0856	R-M417	R-M417	R1a1a1
human0857	R-M417	R-M417	R1a1a1
human0858	R-M417	R-M417	R1a1a1
human0859	R-M417	R-M417	R1a1a1
human0860	R-M417	R-M417	R1a1a1
human0861	R-M417	R-M417	R1a1a1
human0862	R-M417	R-M417	R1a1a1
human0863	R-M417	R-M417	R1a1a1
human0864	R-M417	R-M417	R1a1a1
human0865	R-M417	R-M417	R1a1a1
human0866	R-M417	R-M417	R1a1a1
human0867	R-M417	R-M417	R1a1a1
human0868	R-M417	R-M417	R1a1a1
human0869	R-M417	R-M417	R1a1a1
human0870	R-M417	R-M417	R1a1a1
human0871	R-L23	R-L23	R1b1a2a
human0872	R-L23	R-L23	R1b1a2a
human0873	R-P311	R-P311	R1b1a2a1a
human0874	R-P311	R-P311	R1b1a2a1a
human0875	R-P311	R-P311	R1b1a2a1a
human0876	R-P311	R-P311	R1b1a2a1a
human0877	R-P311	R-P311	R1b1a2a1a
human0878	E-M5389	E-M96	E
human0879	I-L460	I-L460	I2a
human0880	R-M417	R-M417	R1a1a1
human0881	R-M417	R-M417	R1a1a1
human0882	E-M5389	E-M96	E
human0883	C-M216	C-M130	C
human0884	I-L80	I-M253	I1
human0885	R-M417	R-M417	R1a1a1
human0886	R-M417	R-M417	R1a1a1
human0887	R-M417	R-M417	R1a1a1
human0888	R-M417	R-M417	R1a1a1
human0889	R-M417	R-M417	R1a1a1
human0890	R-M417	R-M417	R1a1a1
human0891	R-M417	R-M417	R1a1a1
human0892	E-M5389	E-M96	E
human0893	E-M5389	E-M96	E
human0894	I-L460	I-L460	I2a
human0895	I-L460	I-L460	I2a
human0896	I-L460	I-L460	I2a
human0897	I-L460	I-L460	I2a
human0898	I-L460	I-L460	I2a
human0899	I-M223	I-M223	I2a2a
human0900	J-M172	J-M172	J2
human0901	R-M417	R-M417	R1a1a1
human0902	R-M417	R-M417	R1a1a1
human0903	R-M417	R-M417	R1a1a1
human0904	R-M417	R-M417	R1a1a1
human0905	R-M417	R-M417	R1a1a1
human0906	R-M417	R-M417	R1a1a1
human0907	R-M417	R-M417	R1a1a1
human0908	R-M417	R-M417	R1a1a1
human0909	R-L23	R-L23	R1b1a2a
human0910	E-M5389	E-M96	E
human0911	J-M172	J-M172	J2
human0912	R-M417	R-M417	R1a1a1
human0913	R-M417	R-M417	R1a1a1
human0914	R-M417	R-M417	R1a1a1
human0915	R-M417	R-M417	R1a1a1
human0916	R-P311	R-P311	R1b1a2a1a
human0917	E-M5389	E-M96	E
human0918	J-M172	J-M172	J2
human0919	N-M178	N-M178	N1c1a
human0920	N-M178	N-M178	N1c1a
human0921	R-M417	R-M417	R1a1a1
human0922	E-M5389	E-M96	E
human0923	R-M417	R-M417	R1a1a1
human0924	R-L23	R-L23	R1b1a2a
human0925	E-M5389	E-M96	E
human0926	G-P15	G-P15	G2a
human0927	I-L80	I-M253	I1
human0928	I-L460	I-L460	I2a
human0929	J-M267	J-M267	J1
human0930	R-M417	R-M417	R1a1a1
human0931	R-M417	R-M417	R1a1a1
human0932	R-M417	R-M417	R1a1a1
human0933	R-M417	R-M417	R1a1a1
human0934	R-M417	R-M417	R1a1a1
human0935	R-M417	R-M417	R1a1a1
human0936	R-M417	R-M417	R1a1a1
human0937	R-M417	R-M417	R1a1a1
human0938	R-P311	R-P311	R1b1a2a1a
human0939	R-L21	R-L21	R1b1a2a1a2c
human0940	E-M96	E-M96	E
human0941	I-M253	I-M253	I1
human0942	R-M417	R-M417	R1a1a1
human0943	R-P311	R-P311	R1b1a2a1a
human0944	E-M96	E-M96	E
human0945	I-L460	I-L460	I2a
human0946	I-M223	I-M223	I2a2a
human0947	T-M70	T-M70	T1a
human0948	R-M417	R-M417	R1a1a1
human0949	R-M417	R-M417	R1a1a1
human0950	R-M417	R-M417	R1a1a1
human0951	R-M417	R-M417	R1a1a1
human0952	R-P278.2	R-P278.2	R1a1a1b1a2b1
human0953	R-L23	R-L23	R1b1a2a
human0954	E-M96	E-M96	E
human0955	I-L460	I-L460	I2a
human0956	R-M417	R-M417	R1a1a1
human0957	R-M417	R-M417	R1a1a1
human0958	R-M417	R-M417	R1a1a1
human0959	R-M417	R-M417	R1a1a1
human0960	R-M417	R-M417	R1a1a1
human0961	R-M417	R-M417	R1a1a1
human0962	R-M417	R-M417	R1a1a1
human0963	R-M417	R-M417	R1a1a1
human0964	R-M417	R-M417	R1a1a1
human0965	R-M417	R-M417	R1a1a1
human0966	R-M417	R-M417	R1a1a1
human0967	R-M417	R-M417	R1a1a1
human0968	R-M417	R-M417	R1a1a1
human0969	R-M417	R-M417	R1a1a1
human0970	R-M417	R-M417	R1a1a1
human0971	R-M417	R-M417	R1a1a1
human0972	R-M417	R-M417	R1a1a1
human0973	R-M417	R-M417	R1a1a1
human0974	E-V13	E-V13	E1b1b1a1b1a
human0975	I-L80	I-M253	I1
human0976	I-L80	I-M253	I1
human0977	I-L80	I-M253	I1
human0978	I-L80	I-M253	I1
human0979	I-L460	I-L460	I2a
human0980	J-M172	J-M172	J2
human0981	R-M417	R-M417	R1a1a1
human0982	R-M417	R-M417	R1a1a1
human0983	R-M417	R-M417	R1a1a1
human0984	R-M417	R-M417	R1a1a1
human0985	R-M417	R-M417	R1a1a1
human0986	R-M417	R-M417	R1a1a1
human0987	R-M417	R-M417	R1a1a1
human0988	R-M417	R-M417	R1a1a1
human0989	R-M417	R-M417	R1a1a1
human0990	R-M417	R-M417	R1a1a1
human0991	R-M417	R-M417	R1a1a1
human0992	R-M417	R-M417	R1a1a1
human0993	R-M417	R-M417	R1a1a1
human0994	R-M417	R-M417	R1a1a1
human0995	R-M417	R-M417	R1a1a1
human0996	R-M417	R-M417	R1a1a1
human0997	R-M417	R-M417	R1a1a1
human0998	R-M417	R-M417	R1a1a1
human0999	R-M417	R-M417	R1a1a1
human1000	R-P311	R-P311	R1b1a2a1a
human1001	E-M34	E-M34	E1b1b1b2a1
human1002	E-M34	E-M34	E1b1b1b2a1
human1003	I-P109	I-P109	I1a1b1
human1004	I-L460	I-L460	I2a
human1005	J-M172	J-M172	J2
human1006	R-M417	R-M417	R1a1a1
human1007	R-M417	R-M417	R1a1a1
human1008	R-M417	R-M417	R1a1a1
human1009	R-P311	R-P311	R1b1a2a1a
human1010	R-P311	R-P311	R1b1a2a1a
human1011	C-M216	C-M130	C
human1012	N-M178	N-M178	N1c1a
human1013	R-M417	R-M417	R1a1a1
human1014	R-M417	R-M417	R1a1a1
human1015	R-M417	R-M417	R1a1a1
human1016	R-M417	R-M417	R1a1a1
human1017	R-M417	R-M417	R1a1a1
human1018	R-M417	R-M417	R1a1a1
human1019	R-M417	R-M417	R1a1a1
human1020	R-M417	R-M417	R1a1a1
human1021	R-M417	R-M417	R1a1a1
human1022	R-P311	R-P311	R1b1a2a1a
human1023	R-L21	R-L21	R1b1a2a1a2c
human1024	G-P15	G-P15	G2a
human1025	G-L13	G-L13	G2a2b2a1a1a1
human1026	I-L80	I-M253	I1
human1027	I-L80	I-M253	I1
human1028	I-L460	I-L460	I2a
human1029	I-L460	I-L460	I2a
human1030	I-L460	I-L460	I2a
human1031	I-M223	I-M223	I2a2a
human1032	R-M417	R-M417	R1a1a1
human1033	R-M417	R-M417	R1a1a1
human1034	R-M417	R-M417	R1a1a1
human1035	R-M417	R-M417	R1a1a1
human1036	R-M417	R-M417	R1a1a1
human1037	R-M417	R-M417	R1a1a1
human1038	R-M417	R-M417	R1a1a1
human1039	R-M417	R-M417	R1a1a1
human1040	R-M417	R-M417	R1a1a1
human1041	R-M417	R-M417	R1a1a1
human1042	R-M417	R-M417	R1a1a1
human1043	R-M417	R-M417	R1a1a1
human1044	R-M269	R-M269	R1b1a2
human1045	R-L23	R-L23	R1b1a2a
human1046	R-L23	R-L23	R1b1a2a
human1047	R-P311	R-P311	R1b1a2a1a
human1048	G-P15	G-P15	G2a
human1049	R-M417	R-M417	R1a1a1
human1050	R-P311	R-P311	R1b1a2a1a
human1051	G-P15	G-P15	G2a
human1052	R-M417	R-M417	R1a1a1
human1053	R-M417	R-M417	R1a1a1
human1054	R-M417	R-M417	R1a1a1
human1055	R-M417	R-M417	R1a1a1
human1056	R-M417	R-M417	R1a1a1
human1057	G-P15	G-P15	G2a
human1058	I-M307.2	I-M253	I1
human1059	R-M417	R-M417	R1a1a1
human1060	R-M417	R-M417	R1a1a1
human1061	R-M417	R-M417	R1a1a1
human1062	R-M417	R-M417	R1a1a1
human1063	R-M417	R-M417	R1a1a1
human1064	R-M417	R-M417	R1a1a1
human1065	R-M417	R-M417	R1a1a1
human1066	R-M417	R-M417	R1a1a1
human1067	R-M417	R-M417	R1a1a1
human1068	R-M417	R-M417	R1a1a1
human1069	R-M417	R-M417	R1a1a1
human1070	R-M417	R-M417	R1a1a1
human1071	R-M417	R-M417	R1a1a1
human1072	R-M417	R-M417	R1a1a1
human1073	R-M417	R-M417	R1a1a1
human1074	R-M417	R-M417	R1a1a1
human1075	R-L23	R-L23	R1b1a2a
human1076	R-P311	R-P311	R1b1a2a1a
human1077	G-P15	G-P15	G2a
human1078	J-M92	J-M92	J2a1b1
human1079	N-M178	N-M178	N1c1a
human1080	R-M417	R-M417	R1a1a1
human1081	R-M417	R-M417	R1a1a1
human1082	R-M417	R-M417	R1a1a1
human1083	R-M417	R-M417	R1a1a1
human1084	R-M417	R-M417	R1a1a1
human1085	R-M417	R-M417	R1a1a1
human1086	R-M417	R-M417	R1a1a1
human1087	R-M417	R-M417	R1a1a1
human1088	R-M417	R-M417	R1a1a1
human1089	R-M417	R-M417	R1a1a1
human1090	R-M417	R-M417	R1a1a1
human1091	R-M417	R-M417	R1a1a1
human1092	R-M417	R-M417	R1a1a1
human1093	R-L23	R-L23	R1b1a2a
human1094	G-P15	G-P15	G2a
human1095	I-L22	I-L22	I1a1b
human1096	N-M178	N-M178	N1c1a
human1097	Q-M25	Q-M25	Q1a1b
human1098	R-M417	R-M417	R1a1a1
human1099	R-P311	R-P311	R1b1a2a1a
human1100	G-P15	G-P15	G2a
human1101	G-P15	G-P15	G2a
human1102	I-L80	I-M253	I1
human1103	I-L80	I-M253	I1
human1104	I-L80	I-M253	I1
human1105	I-L80	I-M253	I1
human1106	I-L460	I-L460	I2a
human1107	N-M178	N-M178	N1c1a
human1108	R-M417	R-M417	R1a1a1
human1109	R-M417	R-M417	R1a1a1
human1110	R-M417	R-M417	R1a1a1
human1111	R-M417	R-M417	R1a1a1
human1112	R-M417	R-M417	R1a1a1
human1113	R-M417	R-M417	R1a1a1
human1114	R-M417	R-M417	R1a1a1
human1115	R-M417	R-M417	R1a1a1
human1116	R-M417	R-M417	R1a1a1
human1117	R-M417	R-M417	R1a1a1
human1118	R-M417	R-M417	R1a1a1
human1119	R-M417	R-M417	R1a1a1
human1120	R-M417	R-M417	R1a1a1
human1121	R-M417	R-M417	R1a1a1
human1122	R-M417	R-M417	R1a1a1
human1123	R-M417	R-M417	R1a1a1
human1124	R-M417	R-M417	R1a1a1
human1125	R-M417	R-M417	R1a1a1
human1126	R-M417	R-M417	R1a1a1
human1127	R-M417	R-M417	R1a1a1
human1128	R-M417	R-M417	R1a1a1
human1129	R-P311	R-P311	R1b1a2a1a
human1130	R-P311	R-P311	R1b1a2a1a
human1131	R-L21	R-L21	R1b1a2a1a2c
human1132	G-P15	G-P15	G2a
human1133	I-L460	I-L460	I2a
human1134	R-M417	R-M417	R1a1a1
human1135	R-M417	R-M417	R1a1a1
human1136	R-M417	R-M417	R1a1a1
human1137	R-M417	R-M417	R1a1a1
human1138	R-M417	R-M417	R1a1a1
human1139	R-M417	R-M417	R1a1a1
human1140	R-M417	R-M417	R1a1a1
human1141	R-M417	R-M417	R1a1a1
human1142	R-L23	R-L23	R1b1a2a
human1143	R-P311	R-P311	R1b1a2a1a
human1144	G-P15	G-P15	G2a
human1145	G-P15	G-P15	G2a
human1146	I-L460	I-L460	I2a
human1147	R-M417	R-M417	R1a1a1
human1148	R-M417	R-M417	R1a1a1
human1149	R-M417	R-M417	R1a1a1
human1150	R-M417	R-M417	R1a1a1
human1151	R-M417	R-M417	R1a1a1
human1152	R-M417	R-M417	R1a1a1
human1153	R-M417	R-M417	R1a1a1
human1154	R-P311	R-P311	R1b1a2a1a
human1155	G-P15	G-P15	G2a
human1156	I-L80	I-M253	I1
human1157	I-L460	I-L460	I2a
human1158	R-M417	R-M417	R1a1a1
human1159	R-M417	R-M417	R1a1a1
human1160	R-M417	R-M417	R1a1a1
human1161	R-L23	R-L23	R1b1a2a
human1162	R-P311	R-P311	R1b1a2a1a
human1163	G-P15	G-P15	G2a
human1164	I-L80	I-M253	I1
human1165	I-L460	I-L460	I2a
human1166	I-L460	I-L460	I2a
human1167	J-M267	J-M267	J1
human1168	R-M417	R-M417	R1a1a1
human1169	R-M417	R-M417	R1a1a1
human1170	R-M417	R-M417	R1a1a1
human1171	R-M417	R-M417	R1a1a1
human1172	R-M417	R-M417	R1a1a1
human1173	R-M417	R-M417	R1a1a1
human1174	R-M417	R-M417	R1a1a1
human1175	R-M417	R-M417	R1a1a1
human1176	R-M417	R-M417	R1a1a1
human1177	R-M417	R-M417	R1a1a1
human1178	R-L23	R-L23	R1b1a2a
human1179	R-P311	R-P311	R1b1a2a1a
human1180	G-P15	G-P15	G2a
human1181	I-L80	I-M253	I1
human1182	I-L460	I-L460	I2a
human1183	I-L460	I-L460	I2a
human1184	N-M178	N-M178	N1c1a
human1185	R-M417	R-M417	R1a1a1
human1186	R-M417	R-M417	R1a1a1
human1187	R-M417	R-M417	R1a1a1
human1188	R-M417	R-M417	R1a1a1
human1189	R-M417	R-M417	R1a1a1
human1190	R-P311	R-P311	R1b1a2a1a
human1191	R-P311	R-P311	R1b1a2a1a
human1192	G-P15	G-P15	G2a
human1193	R-L23	R-L23	R1b1a2a
human1194	G-L30	G-L30	G2a2b
human1195	I-M253	I-M253	I1
human1196	I-L460	I-L460	I2a
human1197	R-M417	R-M417	R1a1a1
human1198	R-M417	R-M417	R1a1a1
human1199	R-L23	R-L23	R1b1a2a
human1200	R-L23	R-L23	R1b1a2a
human1201	G-L14	G-L14	G2a2b1a1a
human1202	I-L460	I-L460	I2a
human1203	R-M417	R-M417	R1a1a1
human1204	R-M417	R-M417	R1a1a1
human1205	R-M417	R-M417	R1a1a1
human1206	R-M417	R-M417	R1a1a1
human1207	G-L13	G-L13	G2a2b2a1a1a1
human1208	I-L460	I-L460	I2a
human1209	I-L460	I-L460	I2a
human1210	I-L460	I-L460	I2a
human1211	N-M178	N-M178	N1c1a
human1212	R-M417	R-M417	R1a1a1
human1213	R-M417	R-M417	R1a1a1
human1214	G-L13	G-L13	G2a2b2a1a1a1
human1215	R-M417	R-M417	R1a1a1
human1216	R-M417	R-M417	R1a1a1
human1217	H-M282	H-P96	H2
human1218	I-L80	I-M253	I1
human1219	I-L460	I-L460	I2a
human1220	I-L460	I-L460	I2a
human1221	I-M223	I-M223	I2a2a
human1222	J-M172	J-M172	J2
human1223	R-M417	R-M417	R1a1a1
human1224	R-M417	R-M417	R1a1a1
human1225	R-M417	R-M417	R1a1a1
human1226	R-M417	R-M417	R1a1a1
human1227	R-M417	R-M417	R1a1a1
human1228	R-M417	R-M417	R1a1a1
human1229	R-M417	R-M417	R1a1a1
human1230	R-M417	R-M417	R1a1a1
human1231	R-M417	R-M417	R1a1a1
human1232	R-M417	R-M417	R1a1a1
human1233	R-M417	R-M417	R1a1a1
human1234	R-M417	R-M417	R1a1a1
human1235	R-M417	R-M417	R1a1a1
human1236	R-M417	R-M417	R1a1a1
human1237	R-M417	R-M417	R1a1a1
human1238	R-M417	R-M417	R1a1a1
human1239	R-M417	R-M417	R1a1a1
human1240	R-M417	R-M417	R1a1a1
human1241	R-M417	R-M417	R1a1a1
human1242	R-M417	R-M417	R1a1a1
human1243	R-M417	R-M417	R1a1a1
human1244	R-M417	R-M417	R1a1a1
human1245	R-M417	R-M417	R1a1a1
human1246	R-M417	R-M417	R1a1a1
human1247	R-P311	R-P311	R1b1a2a1a
human1248	R-L21	R-L21	R1b1a2a1a2c
human1249	I-M170	I-M170	I
human1250	I-M253	I-M253	I1
human1251	J-M172	J-M172	J2
human1252	R-M417	R-M417	R1a1a1
human1253	R-M417	R-M417	R1a1a1
human1254	R-M417	R-M417	R1a1a1
human1255	R-M417	R-M417	R1a1a1
human1256	R-L23	R-L23	R1b1a2a
human1257	R-L23	R-L23	R1b1a2a
human1258	R-L23	R-L23	R1b1a2a
human1259	I-M170	I-M170	I
human1260	I-L80	I-M253	I1
human1261	R-M417	R-M417	R1a1a1
human1262	R-M417	R-M417	R1a1a1
human1263	R-M417	R-M417	R1a1a1
human1264	R-L23	R-L23	R1b1a2a
human1265	I-M170	I-M170	I
human1266	I-L22	I-L22	I1a1b
human1267	I-L22	I-L22	I1a1b
human1268	I-P109	I-P109	I1a1b1
human1269	J-M92	J-M92	J2a1b1
human1270	R-M417	R-M417	R1a1a1
human1271	R-M417	R-M417	R1a1a1
human1272	R-M417	R-M417	R1a1a1
human1273	R-M417	R-M417	R1a1a1
human1274	R-M417	R-M417	R1a1a1
human1275	R-M417	R-M417	R1a1a1
human1276	R-P311	R-P311	R1b1a2a1a
human1277	I-M170	I-M170	I
human1278	I-L80	I-M253	I1
human1279	I-L460	I-L460	I2a
human1280	I-L460	I-L460	I2a
human1281	I-L460	I-L460	I2a
human1282	I-M223	I-M223	I2a2a
human1283	I-M223	I-M223	I2a2a
human1284	J-M267	J-M267	J1
human1285	N-M178	N-M178	N1c1a
human1286	N-M178	N-M178	N1c1a
human1287	R-M417	R-M417	R1a1a1
human1288	R-M417	R-M417	R1a1a1
human1289	R-M417	R-M417	R1a1a1
human1290	R-M417	R-M417	R1a1a1
human1291	R-M417	R-M417	R1a1a1
human1292	R-M417	R-M417	R1a1a1
human1293	R-M417	R-M417	R1a1a1
human1294	R-M417	R-M417	R1a1a1
human1295	R-M417	R-M417	R1a1a1
human1296	R-M417	R-M417	R1a1a1
human1297	R-M417	R-M417	R1a1a1
human1298	R-M417	R-M417	R1a1a1
human1299	R-M417	R-M417	R1a1a1
human1300	R-M417	R-M417	R1a1a1
human1301	R-M417	R-M417	R1a1a1
human1302	R-M417	R-M417	R1a1a1
human1303	R-M417	R-M417	R1a1a1
human1304	R-M417	R-M417	R1a1a1
human1305	R-M417	R-M417	R1a1a1
human1306	R-M417	R-M417	R1a1a1
human1307	R-L23	R-L23	R1b1a2a
human1308	R-L23	R-L23	R1b1a2a
human1309	R-L23	R-L23	R1b1a2a
human1310	R-P311	R-P311	R1b1a2a1a
human1311	R-P311	R-P311	R1b1a2a1a
human1312	I-M170	I-M170	I
human1313	I-L80	I-M253	I1
human1314	I-L80	I-M253	I1
human1315	I-L460	I-L460	I2a
human1316	R-M417	R-M417	R1a1a1
human1317	R-M417	R-M417	R1a1a1
human1318	R-M417	R-M417	R1a1a1
human1319	R-M417	R-M417	R1a1a1
human1320	R-P311	R-P311	R1b1a2a1a
human1321	R-P311	R-P311	R1b1a2a1a
human1322	I-L80	I-M253	I1
human1323	R-M417	R-M417	R1a1a1
human1324	R-M417	R-M417	R1a1a1
human1325	R-M417	R-M417	R1a1a1
human1326	R-L23	R-L23	R1b1a2a
human1327	R-P311	R-P311	R1b1a2a1a
human1328	R-P311	R-P311	R1b1a2a1a
human1329	I-L80	I-M253	I1
human1330	I-M223	I-M223	I2a2a
human1331	R-M417	R-M417	R1a1a1
human1332	R-M417	R-M417	R1a1a1
human1333	R-M417	R-M417	R1a1a1
human1334	R-M417	R-M417	R1a1a1
human1335	R-M417	R-M417	R1a1a1
human1336	R-M417	R-M417	R1a1a1
human1337	R-M417	R-M417	R1a1a1
human1338	R-M417	R-M417	R1a1a1
human1339	R-P311	R-P311	R1b1a2a1a
human1340	R-P311	R-P311	R1b1a2a1a
human1341	I-L80	I-M253	I1
human1342	I-L460	I-L460	I2a
human1343	R-M417	R-M417	R1a1a1
human1344	R-M417	R-M417	R1a1a1
human1345	R-M417	R-M417	R1a1a1
human1346	I-L80	I-M253	I1
human1347	I-L460	I-L460	I2a
human1348	I-L460	I-L460	I2a
human1349	I-L460	I-L460	I2a
human1350	I-L460	I-L460	I2a
human1351	R-M417	R-M417	R1a1a1
human1352	R-M417	R-M417	R1a1a1
human1353	R-P311	R-P311	R1b1a2a1a
human1354	R-P311	R-P311	R1b1a2a1a
human1355	I-L80	I-M253	I1
human1356	R-M417	R-M417	R1a1a1
human1357	R-M417	R-M417	R1a1a1
human1358	R-M417	R-M417	R1a1a1
human1359	R-M417	R-M417	R1a1a1
human1360	R-M417	R-M417	R1a1a1
human1361	I-L80	I-M253	I1
human1362	I-L460	I-L460	I2a
human1363	J-L27	J-L26	J2a1
human1364	O-P201	O-P201	O2a2
human1365	R-M417	R-M417	R1a1a1
human1366	R-M417	R-M417	R1a1a1
human1367	R-M417	R-M417	R1a1a1
human1368	R-M417	R-M417	R1a1a1
human1369	R-M417	R-M417	R1a1a1
human1370	R-M417	R-M417	R1a1a1
human1371	R-L21	R-L21	R1b1a2a1a2c
human1372	I-L80	I-M253	I1
human1373	I-L460	I-L460	I2a
human1374	R-M417	R-M417	R1a1a1
human1375	R-M417	R-M417	R1a1a1
human1376	R-M417	R-M417	R1a1a1
human1377	R-M417	R-M417	R1a1a1
human1378	R-M417	R-M417	R1a1a1
human1379	R-M417	R-M417	R1a1a1
human1380	R-M417	R-M417	R1a1a1
human1381	R-M417	R-M417	R1a1a1
human1382	R-M417	R-M417	R1a1a1
human1383	R-M417	R-M417	R1a1a1
human1384	R-P311	R-P311	R1b1a2a1a
human1385	R-P311	R-P311	R1b1a2a1a
human1386	I-L80	I-M253	I1
human1387	I-L460	I-L460	I2a
human1388	J-M92	J-M92	J2a1b1
human1389	R-M417	R-M417	R1a1a1
human1390	R-M417	R-M417	R1a1a1
human1391	R-M417	R-M417	R1a1a1
human1392	R-M417	R-M417	R1a1a1
human1393	R-L23	R-L23	R1b1a2a
human1394	I-L80	I-M253	I1
human1395	I-L80	I-M253	I1
human1396	I-L460	I-L460	I2a
human1397	N-M178	N-M178	N1c1a
human1398	N-M178	N-M178	N1c1a
human1399	N-M178	N-M178	N1c1a
human1400	R-M417	R-M417	R1a1a1
human1401	R-M417	R-M417	R1a1a1
human1402	R-M417	R-M417	R1a1a1
human1403	R-M417	R-M417	R1a1a1
human1404	R-M417	R-M417	R1a1a1
human1405	R-M417	R-M417	R1a1a1
human1406	R-M417	R-M417	R1a1a1
human1407	R-M417	R-M417	R1a1a1
human1408	R-M417	R-M417	R1a1a1
human1409	R-M417	R-M417	R1a1a1
human1410	R-M417	R-M417	R1a1a1
human1411	R-L23	R-L23	R1b1a2a
human1412	R-P311	R-P311	R1b1a2a1a
human1413	R-P311	R-P311	R1b1a2a1a
human1414	R-P311	R-P311	R1b1a2a1a
human1415	I-L80	I-M253	I1
human1416	I-L460	I-L460	I2a
human1417	J-M267	J-M267	J1
human1418	J-L24	J-L24	J2a1h
human1419	N-M178	N-M178	N1c1a
human1420	R-M417	R-M417	R1a1a1
human1421	R-M417	R-M417	R1a1a1
human1422	R-M417	R-M417	R1a1a1
human1423	R-M417	R-M417	R1a1a1
human1424	R-M417	R-M417	R1a1a1
human1425	R-L23	R-L23	R1b1a2a
human1426	R-P311	R-P311	R1b1a2a1a
human1427	I-L80	I-M253	I1
human1428	I-M223	I-M223	I2a2a
human1429	N-M178	N-M178	N1c1a
human1430	R-M417	R-M417	R1a1a1
human1431	R-M417	R-M417	R1a1a1
human1432	R-M417	R-M417	R1a1a1
human1433	R-M417	R-M417	R1a1a1
human1434	R-M417	R-M417	R1a1a1
human1435	R-M417	R-M417	R1a1a1
human1436	R-M417	R-M417	R1a1a1
human1437	R-M417	R-M417	R1a1a1
human1438	R-M417	R-M417	R1a1a1
human1439	R-L23	R-L23	R1b1a2a
human1440	R-P311	R-P311	R1b1a2a1a
human1441	I-L80	I-M253	I1
human1442	R-M417	R-M417	R1a1a1
human1443	R-L23	R-L23	R1b1a2a
human1444	I-L80	I-M253	I1
human1445	I-L460	I-L460	I2a
human1446	J-M267	J-M267	J1
human1447	R-M417	R-M417	R1a1a1
human1448	R-M417	R-M417	R1a1a1
human1449	R-M417	R-M417	R1a1a1
human1450	R-M417	R-M417	R1a1a1
human1451	R-M417	R-M417	R1a1a1
human1452	I-L80	I-M253	I1
human1453	I-L80	I-M253	I1
human1454	I-L460	I-L460	I2a
human1455	I-L460	I-L460	I2a
human1456	R-M417	R-M417	R1a1a1
human1457	R-M417	R-M417	R1a1a1
human1458	R-M417	R-M417	R1a1a1
human1459	R-M417	R-M417	R1a1a1
human1460	R-M417	R-M417	R1a1a1
human1461	R-M417	R-M417	R1a1a1
human1462	R-M417	R-M417	R1a1a1
human1463	R-M417	R-M417	R1a1a1
human1464	R-L23	R-L23	R1b1a2a
human1465	R-P311	R-P311	R1b1a2a1a
human1466	I-L80	I-M253	I1
human1467	J-M267	J-M267	J1
human1468	J-M172	J-M172	J2
human1469	R-M417	R-M417	R1a1a1
human1470	R-M417	R-M417	R1a1a1
human1471	R-M417	R-M417	R1a1a1
human1472	R-P311	R-P311	R1b1a2a1a
human1473	I-M307.2	I-M253	I1
human1474	T-L131	T-L131	T1a2
human1475	R-M417	R-M417	R1a1a1
human1476	R-P311	R-P311	R1b1a2a1a
human1477	I-L80	I-M253	I1
human1478	I-L80	I-M253	I1
human1479	I-L80	I-M253	I1
human1480	I-L80	I-M253	I1
human1481	I-L460	I-L460	I2a
human1482	J-M205	J-M205	J2b1
human1483	N-M178	N-M178	N1c1a
human1484	N-M178	N-M178	N1c1a
human1485	N-M178	N-M178	N1c1a
human1486	N-M178	N-M178	N1c1a
human1487	R-M417	R-M417	R1a1a1
human1488	R-M417	R-M417	R1a1a1
human1489	R-M417	R-M417	R1a1a1
human1490	R-M417	R-M417	R1a1a1
human1491	R-M417	R-M417	R1a1a1
human1492	R-M417	R-M417	R1a1a1
human1493	R-M417	R-M417	R1a1a1
human1494	R-L23	R-L23	R1b1a2a
human1495	R-L23	R-L23	R1b1a2a
human1496	R-L23	R-L23	R1b1a2a
human1497	R-P311	R-P311	R1b1a2a1a
human1498	R-P311	R-P311	R1b1a2a1a
human1499	R-P311	R-P311	R1b1a2a1a
human1500	R-L20	R-L20	R1b1a2a1a2b1a1
human1501	R-L21	R-L21	R1b1a2a1a2c
human1502	I-L80	I-M253	I1
human1503	J-M172	J-M172	J2
human1504	N-M178	N-M178	N1c1a
human1505	N-M178	N-M178	N1c1a
human1506	R-M417	R-M417	R1a1a1
human1507	R-M417	R-M417	R1a1a1
human1508	R-M417	R-M417	R1a1a1
human1509	R-M417	R-M417	R1a1a1
human1510	R-M417	R-M417	R1a1a1
human1511	R-M417	R-M417	R1a1a1
human1512	R-P311	R-P311	R1b1a2a1a
human1513	I-L80	I-M253	I1
human1514	I-L80	I-M253	I1
human1515	I-L80	I-M253	I1
human1516	I-L22	I-L22	I1a1b
human1517	J-M267	J-M267	J1
human1518	J-L24	J-L24	J2a1h
human1519	R-M417	R-M417	R1a1a1
human1520	R-M417	R-M417	R1a1a1
human1521	R-M417	R-M417	R1a1a1
human1522	R-L23	R-L23	R1b1a2a
human1523	R-L23	R-L23	R1b1a2a
human1524	R-L23	R-L23	R1b1a2a
human1525	I-L80	I-M253	I1
human1526	R-M417	R-M417	R1a1a1
human1527	R-M417	R-M417	R1a1a1
human1528	R-M417	R-M417	R1a1a1
human1529	R-M417	R-M417	R1a1a1
human1530	I-L80	I-M253	I1
human1531	I-L460	I-L460	I2a
human1532	J-M92	J-M92	J2a1b1
human1533	J-M92	J-M92	J2a1b1
human1534	R-M417	R-M417	R1a1a1
human1535	R-M417	R-M417	R1a1a1
human1536	R-M417	R-M417	R1a1a1
human1537	R-M417	R-M417	R1a1a1
human1538	R-M417	R-M417	R1a1a1
human1539	R-M417	R-M417	R1a1a1
human1540	I-L80	I-M253	I1
human1541	R-M417	R-M417	R1a1a1
human1542	I-L80	I-M253	I1
human1543	I-L460	I-L460	I2a
human1544	I-L460	I-L460	I2a
human1545	R-M417	R-M417	R1a1a1
human1546	R-M417	R-M417	R1a1a1
human1547	R-M417	R-M417	R1a1a1
human1548	R-M417	R-M417	R1a1a1
human1549	R-M417	R-M417	R1a1a1
human1550	R-M417	R-M417	R1a1a1
human1551	R-P311	R-P311	R1b1a2a1a
human1552	R-U152	R-U152	R1b1a2a1a2b
human1553	I-L80	I-M253	I1
human1554	I-L80	I-M253	I1
human1555	I-L80	I-M253	I1
human1556	J-M172	J-M172	J2
human1557	R-M417	R-M417	R1a1a1
human1558	R-M417	R-M417	R1a1a1
human1559	R-P311	R-P311	R1b1a2a1a
human1560	R-P311	R-P311	R1b1a2a1a
human1561	R-P311	R-P311	R1b1a2a1a
human1562	I-L80	I-M253	I1
human1563	I-L80	I-M253	I1
human1564	J-L27	J-L26	J2a1
human1565	R-M417	R-M417	R1a1a1
human1566	R-M417	R-M417	R1a1a1
human1567	R-M417	R-M417	R1a1a1
human1568	R-P311	R-P311	R1b1a2a1a
human1569	I-L80	I-M253	I1
human1570	J-M172	J-M172	J2
human1571	R-M417	R-M417	R1a1a1
human1572	R-P311	R-P311	R1b1a2a1a
human1573	R-P311	R-P311	R1b1a2a1a
human1574	R-P311	R-P311	R1b1a2a1a
human1575	R-L20	R-L20	R1b1a2a1a2b1a1
human1576	I-L80	I-M253	I1
human1577	R-M417	R-M417	R1a1a1
human1578	R-M417	R-M417	R1a1a1
human1579	R-M417	R-M417	R1a1a1
human1580	R-M417	R-M417	R1a1a1
human1581	I-L80	I-M253	I1
human1582	N-M178	N-M178	N1c1a
human1583	R-M417	R-M417	R1a1a1
human1584	R-M417	R-M417	R1a1a1
human1585	R-M417	R-M417	R1a1a1
human1586	R-P311	R-P311	R1b1a2a1a
human1587	I-L80	I-M253	I1
human1588	I-L80	I-M253	I1
human1589	R-M417	R-M417	R1a1a1
human1590	I-L80	I-M253	I1
human1591	I-L460	I-L460	I2a
human1592	R-M417	R-M417	R1a1a1
human1593	R-M417	R-M417	R1a1a1
human1594	R-M417	R-M417	R1a1a1
human1595	I-L80	I-M253	I1
human1596	N-M178	N-M178	N1c1a
human1597	R-M459	R-M459	R1a1
human1598	R-M417	R-M417	R1a1a1
human1599	R-M417	R-M417	R1a1a1
human1600	R-M417	R-M417	R1a1a1
human1601	R-M417	R-M417	R1a1a1
human1602	R-M417	R-M417	R1a1a1
human1603	R-M417	R-M417	R1a1a1
human1604	R-L23	R-L23	R1b1a2a
human1605	R-P311	R-P311	R1b1a2a1a
human1606	I-L80	I-M253	I1
human1607	I-L460	I-L460	I2a
human1608	R-M417	R-M417	R1a1a1
human1609	R-M417	R-M417	R1a1a1
human1610	R-M417	R-M417	R1a1a1
human1611	R-M417	R-M417	R1a1a1
human1612	I-L80	I-M253	I1
human1613	I-L460	I-L460	I2a
human1614	J-M92	J-M92	J2a1b1
human1615	R-M417	R-M417	R1a1a1
human1616	R-M417	R-M417	R1a1a1
human1617	R-M417	R-M417	R1a1a1
human1618	R-M417	R-M417	R1a1a1
human1619	R-M417	R-M417	R1a1a1
human1620	R-M417	R-M417	R1a1a1
human1621	R-P311	R-P311	R1b1a2a1a
human1622	R-P311	R-P311	R1b1a2a1a
human1623	R-P311	R-P311	R1b1a2a1a
human1624	I-L80	I-M253	I1
human1625	I-L80	I-M253	I1
human1626	R-M417	R-M417	R1a1a1
human1627	R-M417	R-M417	R1a1a1
human1628	I-L80	I-M253	I1
human1629	I-L22	I-L22	I1a1b
human1630	I-L460	I-L460	I2a
human1631	R-M417	R-M417	R1a1a1
human1632	R-M417	R-M417	R1a1a1
human1633	R-P311	R-P311	R1b1a2a1a
human1634	I-L80	I-M253	I1
human1635	N-M178	N-M178	N1c1a
human1636	R-M417	R-M417	R1a1a1
human1637	R-M417	R-M417	R1a1a1
human1638	I-L80	I-M253	I1
human1639	I-L80	I-M253	I1
human1640	I-P109	I-P109	I1a1b1
human1641	I-L460	I-L460	I2a
human1642	I-L460	I-L460	I2a
human1643	N-M178	N-M178	N1c1a
human1644	N-M178	N-M178	N1c1a
human1645	R-M417	R-M417	R1a1a1
human1646	R-M417	R-M417	R1a1a1
human1647	R-M417	R-M417	R1a1a1
human1648	R-M417	R-M417	R1a1a1
human1649	R-M417	R-M417	R1a1a1
human1650	R-P311	R-P311	R1b1a2a1a
human1651	R-P311	R-P311	R1b1a2a1a
human1652	I-M253	I-M253	I1
human1653	I-L460	I-L460	I2a
human1654	R-M417	R-M417	R1a1a1
human1655	R-M417	R-M417	R1a1a1
human1656	I-L80	I-M253	I1
human1657	R-M417	R-M417	R1a1a1
human1658	R-L23	R-L23	R1b1a2a
human1659	I-L80	I-M253	I1
human1660	I-L80	I-M253	I1
human1661	R-M417	R-M417	R1a1a1
human1662	R-M417	R-M417	R1a1a1
human1663	I-L80	I-M253	I1
human1664	R-M417	R-M417	R1a1a1
human1665	R-M417	R-M417	R1a1a1
human1666	R-M417	R-M417	R1a1a1
human1667	R-M417	R-M417	R1a1a1
human1668	I-L80	I-M253	I1
human1669	I-L460	I-L460	I2a
human1670	I-M223	I-M223	I2a2a
human1671	N-M178	N-M178	N1c1a
human1672	R-M417	R-M417	R1a1a1
human1673	R-M417	R-M417	R1a1a1
human1674	R-M417	R-M417	R1a1a1
human1675	R-M417	R-M417	R1a1a1
human1676	R-M417	R-M417	R1a1a1
human1677	R-M417	R-M417	R1a1a1
human1678	R-M417	R-M417	R1a1a1
human1679	R-M417	R-M417	R1a1a1
human1680	R-M417	R-M417	R1a1a1
human1681	R-L23	R-L23	R1b1a2a
human1682	R-P311	R-P311	R1b1a2a1a
human1683	I-L80	I-M253	I1
human1684	I-L460	I-L460	I2a
human1685	I-L460	I-L460	I2a
human1686	R-M417	R-M417	R1a1a1
human1687	R-M417	R-M417	R1a1a1
human1688	I-L80	I-M253	I1
human1689	I-L460	I-L460	I2a
human1690	I-L460	I-L460	I2a
human1691	R-M417	R-M417	R1a1a1
human1692	R-M417	R-M417	R1a1a1
human1693	R-M417	R-M417	R1a1a1
human1694	R-P311	R-P311	R1b1a2a1a
human1695	I-L80	I-M253	I1
human1696	I-L460	I-L460	I2a
human1697	N-M178	N-M178	N1c1a
human1698	R-L23	R-L23	R1b1a2a
human1699	I-L80	I-M253	I1
human1700	R-M417	R-M417	R1a1a1
human1701	R-L23	R-L23	R1b1a2a
human1702	I-L80	I-M253	I1
human1703	I-P109	I-P109	I1a1b1
human1704	R-M417	R-M417	R1a1a1
human1705	R-M417	R-M417	R1a1a1
human1706	R-M417	R-M417	R1a1a1
human1707	R-M417	R-M417	R1a1a1
human1708	R-M417	R-M417	R1a1a1
human1709	R-M417	R-M417	R1a1a1
human1710	R-M417	R-M417	R1a1a1
human1711	R-L23	R-L23	R1b1a2a
human1712	I-L80	I-M253	I1
human1713	I-L460	I-L460	I2a
human1714	J-M267	J-M267	J1
human1715	R-M417	R-M417	R1a1a1
human1716	R-M417	R-M417	R1a1a1
human1717	R-M417	R-M417	R1a1a1
human1718	I-L80	I-M253	I1
human1719	I-M253	I-M253	I1
human1720	I-L460	I-L460	I2a
human1721	R-M417	R-M417	R1a1a1
human1722	I-M253	I-M253	I1
human1723	J-M67	J-M67	J2a1b
human1724	R-M417	R-M417	R1a1a1
human1725	R-M417	R-M417	R1a1a1
human1726	R-M417	R-M417	R1a1a1
human1727	I-M253	I-M253	I1
human1728	R-M417	R-M417	R1a1a1
human1729	R-M417	R-M417	R1a1a1
human1730	R-M417	R-M417	R1a1a1
human1731	R-L23	R-L23	R1b1a2a
human1732	I-L80	I-M253	I1
human1733	I-L80	I-M253	I1
human1734	I-L460	I-L460	I2a
human1735	I-L460	I-L460	I2a
human1736	J-M172	J-M172	J2
human1737	R-M417	R-M417	R1a1a1
human1738	R-M417	R-M417	R1a1a1
human1739	R-M417	R-M417	R1a1a1
human1740	R-M417	R-M417	R1a1a1
human1741	R-M417	R-M417	R1a1a1
human1742	R-M417	R-M417	R1a1a1
human1743	R-M417	R-M417	R1a1a1
human1744	R-M417	R-M417	R1a1a1
human1745	R-M417	R-M417	R1a1a1
human1746	R-M417	R-M417	R1a1a1
human1747	R-M417	R-M417	R1a1a1
human1748	R-L23	R-L23	R1b1a2a
human1749	R-P311	R-P311	R1b1a2a1a
human1750	R-P311	R-P311	R1b1a2a1a
human1751	I-M72	I-M72	I1a1a1
human1752	I-L460	I-L460	I2a
human1753	I-L460	I-L460	I2a
human1754	I-M26	I-M26	I2a1a1
human1755	J-M172	J-M172	J2
human1756	J-M92	J-M92	J2a1b1
human1757	R-M417	R-M417	R1a1a1
human1758	R-M417	R-M417	R1a1a1
human1759	R-M417	R-M417	R1a1a1
human1760	R-M417	R-M417	R1a1a1
human1761	R-M417	R-M417	R1a1a1
human1762	R-M417	R-M417	R1a1a1
human1763	R-M417	R-M417	R1a1a1
human1764	R-M417	R-M417	R1a1a1
human1765	R-M417	R-M417	R1a1a1
human1766	R-M417	R-M417	R1a1a1
human1767	R-M417	R-M417	R1a1a1
human1768	R-L23	R-L23	R1b1a2a
human1769	R-L23	R-L23	R1b1a2a
human1770	R-L23	R-L23	R1b1a2a
human1771	R-L23	R-L23	R1b1a2a
human1772	R-P311	R-P311	R1b1a2a1a
human1773	R-P311	R-P311	R1b1a2a1a
human1774	I-M72	I-M72	I1a1a1
human1775	R-M417	R-M417	R1a1a1
human1776	R-M417	R-M417	R1a1a1
human1777	R-M417	R-M417	R1a1a1
human1778	I-L22	I-L22	I1a1b
human1779	I-L460	I-L460	I2a
human1780	N-M178	N-M178	N1c1a
human1781	R-M417	R-M417	R1a1a1
human1782	R-M417	R-M417	R1a1a1
human1783	R-M417	R-M417	R1a1a1
human1784	R-M417	R-M417	R1a1a1
human1785	R-M417	R-M417	R1a1a1
human1786	R-M417	R-M417	R1a1a1
human1787	R-M417	R-M417	R1a1a1
human1788	R-M417	R-M417	R1a1a1
human1789	R-M417	R-M417	R1a1a1
human1790	I-L22	I-L22	I1a1b
human1791	R-M417	R-M417	R1a1a1
human1792	R-M417	R-M417	R1a1a1
human1793	R-M417	R-M417	R1a1a1
human1794	R-M417	R-M417	R1a1a1
human1795	R-P311	R-P311	R1b1a2a1a
human1796	I-L22	I-L22	I1a1b
human1797	I-L460	I-L460	I2a
human1798	I-L460	I-L460	I2a
human1799	I-L460	I-L460	I2a
human1800	I-L460	I-L460	I2a
human1801	I-M223	I-M223	I2a2a
human1802	NO-P193	NO-M214	NO1
human1803	N-M178	N-M178	N1c1a
human1804	N-M178	N-M178	N1c1a
human1805	N-M178	N-M178	N1c1a
human1806	N-M178	N-M178	N1c1a
human1807	R-M417	R-M417	R1a1a1
human1808	R-M417	R-M417	R1a1a1
human1809	R-M417	R-M417	R1a1a1
human1810	R-M417	R-M417	R1a1a1
human1811	R-M417	R-M417	R1a1a1
human1812	R-M417	R-M417	R1a1a1
human1813	R-M417	R-M417	R1a1a1
human1814	R-M417	R-M417	R1a1a1
human1815	R-L23	R-L23	R1b1a2a
human1816	R-L23	R-L23	R1b1a2a
human1817	R-P311	R-P311	R1b1a2a1a
human1818	I-L22	I-L22	I1a1b
human1819	N-M178	N-M178	N1c1a
human1820	R-M417	R-M417	R1a1a1
human1821	R-M417	R-M417	R1a1a1
human1822	R-M417	R-M417	R1a1a1
human1823	R-M417	R-M417	R1a1a1
human1824	R-P311	R-P311	R1b1a2a1a
human1825	I-L22	I-L22	I1a1b
human1826	I-M223	I-M223	I2a2a
human1827	R-M417	R-M417	R1a1a1
human1828	R-M417	R-M417	R1a1a1
human1829	R-M417	R-M417	R1a1a1
human1830	R-M417	R-M417	R1a1a1
human1831	R-M417	R-M417	R1a1a1
human1832	R-M417	R-M417	R1a1a1
human1833	R-M417	R-M417	R1a1a1
human1834	R-P311	R-P311	R1b1a2a1a
human1835	R-P311	R-P311	R1b1a2a1a
human1836	R-L21	R-L21	R1b1a2a1a2c
human1837	I-P109	I-P109	I1a1b1
human1838	R-M417	R-M417	R1a1a1
human1839	R-M417	R-M417	R1a1a1
human1840	R-M417	R-M417	R1a1a1
human1841	R-M417	R-M417	R1a1a1
human1842	R-L23	R-L23	R1b1a2a
human1843	I-P109	I-P109	I1a1b1
human1844	I-L460	I-L460	I2a
human1845	R-M417	R-M417	R1a1a1
human1846	R-M417	R-M417	R1a1a1
human1847	R-M417	R-M417	R1a1a1
human1848	R-P311	R-P311	R1b1a2a1a
human1849	I-L460	I-L460	I2a
human1850	I-L460	I-L460	I2a
human1851	R-M417	R-M417	R1a1a1
human1852	R-M417	R-M417	R1a1a1
human1853	R-L23	R-L23	R1b1a2a
human1854	R-L23	R-L23	R1b1a2a
human1855	I-L460	I-L460	I2a
human1856	I-L460	I-L460	I2a
human1857	R-M417	R-M417	R1a1a1
human1858	R-L23	R-L23	R1b1a2a
human1859	R-P311	R-P311	R1b1a2a1a
human1860	I-L460	I-L460	I2a
human1861	I-L460	I-L460	I2a
human1862	I-L460	I-L460	I2a
human1863	N-M178	N-M178	N1c1a
human1864	R-M417	R-M417	R1a1a1
human1865	R-M417	R-M417	R1a1a1
human1866	R-M417	R-M417	R1a1a1
human1867	R-M417	R-M417	R1a1a1
human1868	R-L23	R-L23	R1b1a2a
human1869	I-L460	I-L460	I2a
human1870	I-L460	I-L460	I2a
human1871	I-M223	I-M223	I2a2a
human1872	N-M178	N-M178	N1c1a
human1873	R-M417	R-M417	R1a1a1
human1874	R-M417	R-M417	R1a1a1
human1875	R-M417	R-M417	R1a1a1
human1876	R-M417	R-M417	R1a1a1
human1877	R-P311	R-P311	R1b1a2a1a
human1878	I-L460	I-L460	I2a
human1879	R-M417	R-M417	R1a1a1
human1880	R-M417	R-M417	R1a1a1
human1881	R-M417	R-M417	R1a1a1
human1882	R-M417	R-M417	R1a1a1
human1883	I-L460	I-L460	I2a
human1884	N-M178	N-M178	N1c1a
human1885	N-M178	N-M178	N1c1a
human1886	R-M417	R-M417	R1a1a1
human1887	R-M417	R-M417	R1a1a1
human1888	R-M417	R-M417	R1a1a1
human1889	I-L460	I-L460	I2a
human1890	N-M178	N-M178	N1c1a
human1891	R-M417	R-M417	R1a1a1
human1892	R-M417	R-M417	R1a1a1
human1893	R-M417	R-M417	R1a1a1
human1894	I-L460	I-L460	I2a
human1895	N-M178	N-M178	N1c1a
human1896	N-M178	N-M178	N1c1a
human1897	R-M417	R-M417	R1a1a1
human1898	R-M417	R-M417	R1a1a1
human1899	R-M417	R-M417	R1a1a1
human1900	R-M417	R-M417	R1a1a1
human1901	R-M417	R-M417	R1a1a1
human1902	R-M417	R-M417	R1a1a1
human1903	R-M417	R-M417	R1a1a1
human1904	I-L460	I-L460	I2a
human1905	I-L460	I-L460	I2a
human1906	R-M417	R-M417	R1a1a1
human1907	R-M417	R-M417	R1a1a1
human1908	R-P311	R-P311	R1b1a2a1a
human1909	R-P311	R-P311	R1b1a2a1a
human1910	I-L460	I-L460	I2a
human1911	I-L460	I-L460	I2a
human1912	I-M223	I-M223	I2a2a
human1913	R-M417	R-M417	R1a1a1
human1914	R-M417	R-M417	R1a1a1
human1915	R-M417	R-M417	R1a1a1
human1916	R-M417	R-M417	R1a1a1
human1917	R-M417	R-M417	R1a1a1
human1918	I-L460	I-L460	I2a
human1919	I-M223	I-M223	I2a2a
human1920	R-M417	R-M417	R1a1a1
human1921	R-M417	R-M417	R1a1a1
human1922	R-M417	R-M417	R1a1a1
human1923	R-M417	R-M417	R1a1a1
human1924	R-P311	R-P311	R1b1a2a1a
human1925	I-L460	I-L460	I2a
human1926	I-L38	I-L38	I2a2b
human1927	R-M417	R-M417	R1a1a1
human1928	R-M417	R-M417	R1a1a1
human1929	R-M417	R-M417	R1a1a1
human1930	I-L460	I-L460	I2a
human1931	N-M178	N-M178	N1c1a
human1932	R-M417	R-M417	R1a1a1
human1933	R-M417	R-M417	R1a1a1
human1934	R-M417	R-M417	R1a1a1
human1935	R-M417	R-M417	R1a1a1
human1936	R-M417	R-M417	R1a1a1
human1937	R-M417	R-M417	R1a1a1
human1938	R-M417	R-M417	R1a1a1
human1939	R-M417	R-M417	R1a1a1
human1940	R-M417	R-M417	R1a1a1
human1941	R-M417	R-M417	R1a1a1
human1942	R-P311	R-P311	R1b1a2a1a
human1943	R-P311	R-P311	R1b1a2a1a
human1944	I-L460	I-L460	I2a
human1945	N-M178	N-M178	N1c1a
human1946	R-M417	R-M417	R1a1a1
human1947	R-M417	R-M417	R1a1a1
human1948	R-M417	R-M417	R1a1a1
human1949	R-M417	R-M417	R1a1a1
human1950	R-P311	R-P311	R1b1a2a1a
human1951	I-L460	I-L460	I2a
human1952	I-L460	I-L460	I2a
human1953	I-L460	I-L460	I2a
human1954	I-L460	I-L460	I2a
human1955	I-L38	I-L38	I2a2b
human1956	R-M417	R-M417	R1a1a1
human1957	R-M417	R-M417	R1a1a1
human1958	R-M417	R-M417	R1a1a1
human1959	R-M417	R-M417	R1a1a1
human1960	R-M417	R-M417	R1a1a1
human1961	R-M417	R-M417	R1a1a1
human1962	R-M417	R-M417	R1a1a1
human1963	R-M417	R-M417	R1a1a1
human1964	R-M417	R-M417	R1a1a1
human1965	R-M417	R-M417	R1a1a1
human1966	R-P311	R-P311	R1b1a2a1a
human1967	I-L460	I-L460	I2a
human1968	N-M178	N-M178	N1c1a
human1969	R-M417	R-M417	R1a1a1
human1970	I-L460	I-L460	I2a
human1971	R-M417	R-M417	R1a1a1
human1972	R-M417	R-M417	R1a1a1
human1973	R-M417	R-M417	R1a1a1
human1974	R-M417	R-M417	R1a1a1
human1975	R-M417	R-M417	R1a1a1
human1976	R-P311	R-P311	R1b1a2a1a
human1977	I-L460	I-L460	I2a
human1978	R-M417	R-M417	R1a1a1
human1979	R-M417	R-M417	R1a1a1
human1980	R-L23	R-L23	R1b1a2a
human1981	R-P311	R-P311	R1b1a2a1a
human1982	I-L460	I-L460	I2a
human1983	R-M417	R-M417	R1a1a1
human1984	R-M417	R-M417	R1a1a1
human1985	R-M417	R-M417	R1a1a1
human1986	R-M417	R-M417	R1a1a1
human1987	R-M417	R-M417	R1a1a1
human1988	R-M417	R-M417	R1a1a1
human1989	R-M417	R-M417	R1a1a1
human1990	R-M417	R-M417	R1a1a1
human1991	R-L23	R-L23	R1b1a2a
human1992	I-L460	I-L460	I2a
human1993	J-M92	J-M92	J2a1b1
human1994	T-M70	T-M70	T1a
human1995	R-M417	R-M417	R1a1a1
human1996	R-M417	R-M417	R1a1a1
human1997	R-M417	R-M417	R1a1a1
human1998	R-M417	R-M417	R1a1a1
[truncated: 707 more rows]
