# Supplementary material for: Y-Chromosome Genetic Analysis of Modern Polish Population
Source: Front Genet. 2020 Oct 23;11:567309. doi: 10.3389/fgene.2020.567309 (PMC7644898; doi:10.3389/fgene.2020.567309)
Supplement: Supplementary file 5 [file Table_4.xlsx]

## Sheet: Fst_voivodeships
Table S4. Fst values calculated between each pair of voivodeships. Statistically significant results are marked with plus (+) (P-values < 0.05, based on 10 000 permutations)
		Greater Poland	Holy Cross	Kuyavian Pomeranian	Lesser Poland	Lodz	Lower Silesia	Lublin	Lubusz	Mazovia	Opole	Podlaskie	Pomeranian	Silesia	Subcarpathian	Warmian-Mazurian	West Pomeranian
	Greater Poland	0.00000																				num	Voivodeship
	Holy Cross	-0.00164	0.00000																			1:	greater_poland
	Kuyavian Pomeranian	0.00477	0.01312	0.00000																		2:	holy_cross
	Lesser Poland	0.00103	-0.00338	0.01239	0.00000																	3:	kuyavian-pomeranian
	Lodz	0.03450	0.06299	0.01328	0.04426	0.00000																4:	lesser_poland
	Lower Silesia	0.01232	-0.00032	0.03516	0.00976	0.09123	0.00000															5:	lodz
	Lublin	0.00162	-0.00155	0.00639	0.00546	0.04363	0.01077	0.00000														6:	lower_silesia
	Lubusz	0.00381	-0.00215	0.02140	0.00424	0.06916	-0.00024	0.00625	0.00000													7:	lublin
	Mazovia	-0.00028	0.00053	0.00198	0.00461	0.03246	0.01504	-0.00113	0.00678	0.00000												8:	lubusz
	Opole	-0.00145	-0.00777	0.00694	-0.00055	0.04827	0.00549	-0.00010	-0.00024	-0.00043	0.00000											9:	mazovia
	Podlaskie	0.01053	-0.00438	0.02984	0.00827	0.08500	-0.00026	0.00789	0.00101	0.01222	0.00215	0.00000										10:	opole
	Pomeranian	-0.00088	0.00024	0.00243	0.00239	0.02852	0.01779	0.00374	0.00646	0.00053	-0.00128	0.01303	0.00000									11:	podlaskie
	Silesia	0.00034	-0.00046	0.00741	0.00142	0.03403	0.01561	0.00705	0.00573	0.00393	-0.00095	0.01211	-0.00057	0.00000								12:	pomeranian
	Subcarpathian	0.00042	0.00443	-0.00011	0.00448	0.02058	0.02509	0.00538	0.01299	0.00126	0.00153	0.02087	-0.00111	0.00100	0.00000							13:	silesia
	Warmian-Mazurian	-0.00153	-0.00547	0.00640	-0.00062	0.04110	0.00980	0.00196	0.00250	0.00066	-0.00452	0.00561	-0.00188	-0.00154	0.00041	0.00000						14:	subcarpathian
	West Pomeranian	-0.00123	-0.00471	0.00548	0.00151	0.04232	0.00887	-0.00237	0.00318	-0.00186	-0.00255	0.00515	0.00015	0.00254	0.00236	-0.00179	0.00000					15:	warmian-mazurian
																						16:	west_pomeranian
		Greater Poland	Holy Cross	Kuyavian Pomeranian	Lesser Poland	Lodz	Lower Silesia	Lublin	Lubusz	Mazovia	Opole	Podlaskie	Pomeranian	Silesia	Subcarpathian	Warmian-Mazurian	West Pomeranian
	Greater Poland	*
	Holy Cross	0.72461+-0.0135	*
	Kuyavian Pomeranian	0.19141+-0.0107	0.26660+-0.0148	*
	Lesser Poland	0.49023+-0.0161	0.82422+-0.0144	0.05859+-0.0083	*
	Lodz	0.00293+-0.0016	0.01270+-0.0031	0.10059+-0.0077	0.00293+-0.0016	*
	Lower Silesia	0.04297+-0.0067	0.60742+-0.0138	0.00293+-0.0016	0.11621+-0.0111	0.00000+-0.0000	*
	Lublin	0.41699+-0.0124	0.69043+-0.0150	0.19043+-0.0100	0.21582+-0.0125	0.00000+-0.0000	0.06738+-0.0061	*
	Lubusz	0.31836+-0.0152	0.72070+-0.0169	0.04004+-0.0059	0.33594+-0.0144	0.00000+-0.0000	0.62695+-0.0163	0.21387+-0.0135	*
	Mazovia	0.66504+-0.0165	0.60840+-0.0145	0.39258+-0.0100	0.22754+-0.0132	0.00293+-0.0016	0.03906+-0.0057	0.82129+-0.0124	0.19336+-0.0130	*
	Opole	0.75879+-0.0149	0.95410+-0.0066	0.30664+-0.0193	0.71289+-0.0128	0.00293+-0.0016	0.33594+-0.0128	0.60742+-0.0163	0.61523+-0.0144	0.63965+-0.0167	*
	Podlaskie	0.08984+-0.0106	0.83691+-0.0093	0.01367+-0.0039	0.16309+-0.0109	0.00000+-0.0000	0.59570+-0.0139	0.17578+-0.0114	0.54199+-0.0146	0.07812+-0.0075	0.48438+-0.0170	*
	Pomeranian	0.82324+-0.0150	0.60156+-0.0150	0.36426+-0.0141	0.39551+-0.0139	0.00098+-0.0010	0.02051+-0.0041	0.25586+-0.0144	0.20801+-0.0112	0.52051+-0.0137	0.72656+-0.0146	0.07812+-0.0092	*
	Silesia	0.55469+-0.0131	0.66895+-0.0139	0.08984+-0.0074	0.41309+-0.0142	0.00000+-0.0000	0.01465+-0.0034	0.06348+-0.0071	0.17188+-0.0105	0.15039+-0.0099	0.72168+-0.0151	0.06250+-0.0072	0.78320+-0.0127	*
	Subcarpathian	0.56348+-0.0134	0.45801+-0.0192	0.61621+-0.0133	0.25195+-0.0117	0.00879+-0.0032	0.00879+-0.0029	0.15723+-0.0124	0.07617+-0.0071	0.44434+-0.0134	0.49414+-0.0155	0.02637+-0.0052	0.83203+-0.0112	0.41602+-0.0170	*
	Warmian-Mazurian	0.82910+-0.0103	0.89453+-0.0096	0.22949+-0.0129	0.68066+-0.0118	0.00391+-0.0019	0.11914+-0.0107	0.44531+-0.0133	0.45117+-0.0152	0.53027+-0.0138	0.96484+-0.0059	0.28418+-0.0153	0.85742+-0.0090	0.89062+-0.0109	0.57617+-0.0171	*
	West Pomeranian	0.79688+-0.0145	0.87305+-0.0093	0.25879+-0.0136	0.49707+-0.0135	0.00586+-0.0022	0.16602+-0.0111	0.93164+-0.0073	0.38770+-0.0126	0.87500+-0.0121	0.81836+-0.0127	0.29688+-0.0146	0.58496+-0.0166	0.34180+-0.0147	0.41016+-0.0119	0.80469+-0.0096	*
		Greater Poland	Holy Cross	Kuyavian Pomeranian	Lesser Poland	Lodz	Lower Silesia	Lublin	Lubusz	Mazovia	Opole	Podlaskie	Pomeranian	Silesia	Subcarpathian	Warmian-Mazurian	West Pomeranian
	Greater Poland	*	-	-	-	+	+	-	-	-	-	-	-	-	-	-	-
	Holy Cross	-	*	-	-	+	-	-	-	-	-	-	-	-	-	-	-
	Kuyavian Pomeranian	-	-	*	-	-	+	-	+	-	-	+	-	-	-	-	-
	Lesser Poland	-	-	-	*	+	-	-	-	-	-	-	-	-	-	-	-
	Lodz	+	+	-	+	*	+	+	+	+	+	+	+	+	+	+	+
	Lower Silesia	+	-	+	-	+	*	-	-	+	-	-	+	+	+	-	-
	Lublin	-	-	-	-	+	-	*	-	-	-	-	-	-	-	-	-
	Lubusz	-	-	+	-	+	-	-	*	-	-	-	-	-	-	-	-
	Mazovia	-	-	-	-	+	+	-	-	*	-	-	-	-	-	-	-
	Opole	-	-	-	-	+	-	-	-	-	*	-	-	-	-	-	-
	Podlaskie	-	-	+	-	+	-	-	-	-	-	*	-	-	+	-	-
	Pomeranian	-	-	-	-	+	+	-	-	-	-	-	*	-	-	-	-
	Silesia	-	-	-	-	+	+	-	-	-	-	-	-	*	-	-	-
	Subcarpathian	-	-	-	-	+	+	-	-	-	-	+	-	-	*	-	-
	Warmian-Mazurian	-	-	-	-	+	-	-	-	-	-	-	-	-	-	*	-
	West Pomeranian	-	-	-	-	+	-	-	-	-	-	-	-	-	-	-	*
